# Supplementary material for: New Application of 1,2,4-Triazole Derivatives as Antitubercular Agents. Structure, In Vitro Screening and Docking Studies
Source: PubMed Central journal article supplement (PMC7767103; doi:10.3390/molecules25246033), 2020-12-19

## Supplementary material for publication on line

# New application of 1,2,4-triazole derivatives as antitubercular agents. Structure, in vitro screening and docking studies.

Zbigniew Karczmarzyk<sup>1</sup>, Marta Swatko-Ossor<sup>2</sup>, Waldemar Wysocki<sup>2</sup>, Monika Drozd<sup>3</sup>, Grazyna Ginalska<sup>2</sup>, Anna Pachut-Stec<sup>3</sup>, Monika Pitucha<sup>3\*</sup>

<sup>1</sup>Faculty of Science, Siedlce University of Natural Sciences and Humanities, Siedlce, Poland, <sup>2</sup>Department of Biochemistry and Biotechnology, Faculty of Pharmacy, Medical University of Lublin, Poland, <sup>3</sup>Independent Radiopharmacy Unit, Faculty of Pharmacy, Medical University of Lublin, Poland; monika.pitucha@umlub.pl (M.P)

\* Correspondence: monika.pitucha@umlub.pl (M.P); Tel.: +48-81-448-74-20

### X-ray structure determination

#### CIF for C1

data\_shelx

```
_audit_creation_method      'SHELXL-2014/7'
_shelx_SHELXL_version_number  '2014/7'
_chemical_name_systematic
;
4-(2-fluorophenyl)-3-(2-pyridyl)-1H-1,2,4-triazole-5-thione
;
_chemical_name_common       ?
_chemical_melting_point     ?
_chemical_formula_moiety    'C13 H9 F N4 S'
_chemical_formula_sum       'C13 H9 F N4 S'
_chemical_formula_weight    272.30
```

loop\_

```
_atom_type_symbol
_atom_type_description
_atom_type_scatter_dispersion_real
_atom_type_scatter_dispersion_imag
_atom_type_scatter_source
'C' 'C' 0.0033 0.0016
'International Tables Vol C Tables 4.2.6.8 and 6.1.1.4'
'H' 'H' 0.0000 0.0000
'International Tables Vol C Tables 4.2.6.8 and 6.1.1.4'
'N' 'N' 0.0061 0.0033
'International Tables Vol C Tables 4.2.6.8 and 6.1.1.4'
'F' 'F' 0.0171 0.0103
```

'International Tables Vol C Tables 4.2.6.8 and 6.1.1.4'

'S' 'S' 0.1246 0.1234

'International Tables Vol C Tables 4.2.6.8 and 6.1.1.4'

```
_space_group_crystal_system    triclinic
_space_group_IT_number         2
_space_group_name_H-M_alt      'P -1'
_space_group_name_Hall         '-P 1'
```

```
_shelx_space_group_comment
```

```
;
```

The symmetry employed for this shelxl refinement is uniquely defined by the following loop, which should always be used as a source of symmetry information in preference to the above space-group names. They are only intended as comments.

```
;
```

```
loop_
```

```
_space_group_symop_operation_xyz
```

```
'x, y, z'
```

```
'-x, -y, -z'
```

```
_cell_length_a                7.0908(6)
_cell_length_b                7.8326(7)
_cell_length_c                12.4147(10)
_cell_angle_alpha             71.722(8)
_cell_angle_beta              74.428(7)
_cell_angle_gamma             87.846(7)
_cell_volume                   629.87(10)
_cell_formula_units_Z         2
_cell_measurement_temperature 296(2)
_cell_measurement_reflns_used 1379
_cell_measurement_theta_min   1.8080
_cell_measurement_theta_max   28.0210
```

```
_exptl_crystal_description    prism
_exptl_crystal_colour         colourless
_exptl_crystal_density_meas   ?
_exptl_crystal_density_method ?
_exptl_crystal_density_diffn  1.436
_exptl_crystal_F_000         280
_exptl_transmission_factor_min ?
_exptl_transmission_factor_max ?
_exptl_crystal_size_max      0.20
_exptl_crystal_size_mid     0.15
_exptl_crystal_size_min     0.10
_exptl_absorpt_coefficient_mu 0.259
_shelx_estimated_absorpt_T_min ?
_shelx_estimated_absorpt_T_max ?
_exptl_absorpt_correction_T_min 0.79631
_exptl_absorpt_correction_T_max 1.00000
```

```

_exptl_absorpt_correction_type 'multi-scan'
_exptl_absorpt_process_details
;
CrysAlisPro, Agilent Technologies,
Version 1.171.37.35h (release 09-02-2015 CrysAlis171 .NET)
(compiled Feb 9 2015,16:26:32)
Empirical absorption correction using spherical harmonics,
implemented in SCALE3 ABSPACK scaling algorithm.
;
_exptl_absorpt_special_details ?
_diffn_ambient_temperature 296(2)
_diffn_radiation_wavelength 0.71073
_diffn_radiation_type MoK\alpha
_diffn_source ?
_diffn_measurement_device_type 'KM4 CCD four-circle diffractometer'
_diffn_measurement_method '\w scans'
_diffn_detector_area_resol_mean ?
_diffn_reflns_number 4337
_diffn_reflns_av_unetI/netI 0.0534
_diffn_reflns_av_R_equivalents 0.0301
_diffn_reflns_limit_h_min -9
_diffn_reflns_limit_h_max 8
_diffn_reflns_limit_k_min -9
_diffn_reflns_limit_k_max 8
_diffn_reflns_limit_l_min -16
_diffn_reflns_limit_l_max 16
_diffn_reflns_theta_min 1.794
_diffn_reflns_theta_max 29.112
_diffn_reflns_theta_full 25.242
_diffn_measured_fraction_theta_max 0.841
_diffn_measured_fraction_theta_full 1.000
_diffn_reflns_Laue_measured_fraction_max 0.841
_diffn_reflns_Laue_measured_fraction_full 1.000
_diffn_reflns_point_group_measured_fraction_max 0.841
_diffn_reflns_point_group_measured_fraction_full 1.000
_reflns_number_total 2845
_reflns_number_gt 2092
_reflns_threshold_expression 'I > 2\sigma(I)'
_reflns_Friedel_coverage 0.000
_reflns_Friedel_fraction_max .
_reflns_Friedel_fraction_full .

```

```
_reflns_special_details
```

```
;
Reflections were merged by SHELXL according to the crystal
class for the calculation of statistics and refinement.
```

\_reflns\_Friedel\_fraction is defined as the number of unique Friedel pairs measured divided by the number that would be possible theoretically, ignoring centric projections and systematic absences.

```

;
_computing_data_collection
;
CrysAlisPro, Agilent Technologies,
Version 1.171.37.35h (release 09-02-2015 CrysAlis171 .NET)
(compiled Feb 9 2015,16:26:32)
;
_computing_cell_refinement
;
CrysAlisPro, Agilent Technologies,
Version 1.171.37.35h (release 09-02-2015 CrysAlis171 .NET)
(compiled Feb 9 2015,16:26:32)
;
_computing_data_reduction
;
CrysAlisPro, Agilent Technologies,
Version 1.171.37.35h (release 09-02-2015 CrysAlis171 .NET)
(compiled Feb 9 2015,16:26:32)
;
_computing_structure_solution 'SHELXS-2013/1 (Sheldrick, 2013)'
_computing_structure_refinement 'SHELXL-2014/7 (Sheldrick, 2014)'
_computing_molecular_graphics 'ORTEP3 for Windows (Farrugia, 2012)'
_computing_publication_material
;
SHELXL-2014/7 (Sheldrick, 2014) and WINGX (Farrugia, 2012)
;
_refine_special_details ?
_refine_ls_structure_factor_coef Fsqd
_refine_ls_matrix_type full
_refine_ls_weighting_scheme calc
_refine_ls_weighting_details
'w=1/[\s^2^(Fo^2^)+(0.0698P)^2^+0.1997P] where P=(Fo^2^+2Fc^2^)/3'
_atom_sites_solution_primary refxyz
_atom_sites_solution_secondary ?
_atom_sites_solution_hydrogens mixed
_refine_ls_hydrogen_treatment mixed
_refine_ls_extinction_method none
_refine_ls_extinction_coef .
_refine_ls_number_reflns 2845
_refine_ls_number_parameters 175
_refine_ls_number_restraints 0
_refine_ls_R_factor_all 0.0802
_refine_ls_R_factor_gt 0.0559
_refine_ls_wR_factor_ref 0.1638
_refine_ls_wR_factor_gt 0.1416
_refine_ls_goodness_of_fit_ref 1.080
_refine_ls_restrained_S_all 1.080
_refine_ls_shift/su_max 0.000
_refine_ls_shift/su_mean 0.000

```

```

loop_
  _atom_site_label
  _atom_site_type_symbol
  _atom_site_fract_x
  _atom_site_fract_y
  _atom_site_fract_z
  _atom_site_U_iso_or_equiv
  _atom_site_adp_type
  _atom_site_occupancy
  _atom_site_site_symmetry_order
  _atom_site_calc_flag
  _atom_site_refinement_flags_posn
  _atom_site_refinement_flags_adp
  _atom_site_refinement_flags_occupancy
  _atom_site_disorder_assembly
  _atom_site_disorder_group
S5 S 1.02937(11) -0.08188(11) 0.83396(6) 0.0529(3) Uani 1 1 d . . . . .
F42 F 0.8709(3) 0.2988(3) 0.56558(16) 0.0712(6) Uani 1 1 d . . . . .
N1 N 0.7815(4) 0.1184(3) 0.9481(2) 0.0489(6) Uani 1 1 d . . . . .
H1 H 0.835(5) 0.101(4) 1.008(3) 0.073 Uiso 1 1 d . U . . .
N2 N 0.6229(4) 0.2223(3) 0.9409(2) 0.0514(6) Uani 1 1 d . . . . .
N4 N 0.7062(3) 0.1032(3) 0.79626(18) 0.0397(5) Uani 1 1 d . . . . .
N62 N 0.4161(4) 0.3240(3) 0.6953(2) 0.0544(6) Uani 1 1 d . . . . .
C3 C 0.5785(4) 0.2111(4) 0.8478(2) 0.0427(6) Uani 1 1 d . . . . .
C5 C 0.8395(4) 0.0452(4) 0.8613(2) 0.0417(6) Uani 1 1 d . . . . .
C41 C 0.6988(4) 0.0385(3) 0.7014(2) 0.0391(6) Uani 1 1 d . . . . .
C42 C 0.7849(4) 0.1372(4) 0.5867(2) 0.0430(6) Uani 1 1 d . . . . .
C43 C 0.7865(4) 0.0760(4) 0.4945(3) 0.0548(8) Uani 1 1 d . . . . .
H43 H 0.8438 0.1460 0.4171 0.082 Uiso 1 1 calc R U . . .
C44 C 0.7012(5) -0.0912(5) 0.5192(3) 0.0616(9) Uani 1 1 d . . . . .
H44 H 0.7010 -0.1353 0.4579 0.092 Uiso 1 1 calc R U . . .
C45 C 0.6160(5) -0.1947(4) 0.6338(3) 0.0665(9) Uani 1 1 d . . . . .
H45 H 0.5590 -0.3078 0.6491 0.100 Uiso 1 1 calc R U . . .
C46 C 0.6146(5) -0.1310(4) 0.7268(3) 0.0554(7) Uani 1 1 d . . . . .
H46 H 0.5584 -0.2009 0.8044 0.083 Uiso 1 1 calc R U . . .
C61 C 0.4153(4) 0.3050(4) 0.8062(2) 0.0448(6) Uani 1 1 d . . . . .
C63 C 0.2672(5) 0.4080(4) 0.6589(3) 0.0639(9) Uani 1 1 d . . . . .
H63 H 0.2657 0.4234 0.5817 0.096 Uiso 1 1 calc R U . . .
C64 C 0.1161(5) 0.4733(4) 0.7273(3) 0.0637(9) Uani 1 1 d . . . . .
H64 H 0.0134 0.5279 0.6981 0.096 Uiso 1 1 calc R U . . .
C65 C 0.1199(5) 0.4563(5) 0.8396(3) 0.0678(9) Uani 1 1 d . . . . .
H65 H 0.0214 0.5023 0.8876 0.102 Uiso 1 1 calc R U . . .
C66 C 0.2721(5) 0.3696(4) 0.8810(3) 0.0605(8) Uani 1 1 d . . . . .
H66 H 0.2776 0.3554 0.9573 0.091 Uiso 1 1 calc R U . . .

```

```

loop_
  _atom_site_aniso_label
  _atom_site_aniso_U_11
  _atom_site_aniso_U_22
  _atom_site_aniso_U_33
  _atom_site_aniso_U_23

```

```

_atom_site_aniso_U_13
_atom_site_aniso_U_12
S5 0.0579(5) 0.0677(5) 0.0436(4) -0.0256(4) -0.0237(3) 0.0197(4)
F42 0.0875(13) 0.0660(12) 0.0552(11) -0.0081(9) -0.0214(10) -0.0176(10)
N1 0.0581(14) 0.0573(15) 0.0399(12) -0.0215(11) -0.0215(11) 0.0130(11)
N2 0.0593(14) 0.0574(15) 0.0458(13) -0.0239(12) -0.0202(11) 0.0128(12)
N4 0.0463(12) 0.0420(12) 0.0346(11) -0.0135(9) -0.0159(9) 0.0051(9)
N62 0.0650(15) 0.0557(15) 0.0575(15) -0.0277(13) -0.0316(12) 0.0217(12)
C3 0.0493(15) 0.0431(14) 0.0388(13) -0.0161(12) -0.0138(11) 0.0059(11)
C5 0.0487(15) 0.0442(14) 0.0348(12) -0.0120(11) -0.0160(11) 0.0013(11)
C41 0.0434(14) 0.0432(14) 0.0371(13) -0.0159(11) -0.0178(11) 0.0052(11)
C42 0.0433(14) 0.0470(15) 0.0445(14) -0.0173(12) -0.0179(11) 0.0019(11)
C43 0.0518(16) 0.076(2) 0.0438(16) -0.0249(16) -0.0192(13) 0.0100(15)
C44 0.069(2) 0.076(2) 0.066(2) -0.0434(19) -0.0372(17) 0.0188(17)
C45 0.080(2) 0.0518(19) 0.086(3) -0.0317(19) -0.041(2) 0.0018(16)
C46 0.0645(18) 0.0487(17) 0.0587(18) -0.0169(15) -0.0251(15) -0.0021(14)
C61 0.0499(15) 0.0393(14) 0.0474(15) -0.0150(12) -0.0158(12) 0.0052(11)
C63 0.076(2) 0.059(2) 0.078(2) -0.0320(18) -0.0447(19) 0.0209(16)
C64 0.0592(19) 0.0496(18) 0.087(2) -0.0177(17) -0.0331(18) 0.0141(14)
C65 0.060(2) 0.059(2) 0.076(2) -0.0184(18) -0.0090(17) 0.0178(15)
C66 0.065(2) 0.0601(19) 0.0514(17) -0.0155(15) -0.0126(15) 0.0167(15)

```

\_geom\_special\_details

;

All esds (except the esd in the dihedral angle between two l.s. planes) are estimated using the full covariance matrix. The cell esds are taken into account individually in the estimation of esds in distances, angles and torsion angles; correlations between esds in cell parameters are only used when they are defined by crystal symmetry. An approximate (isotropic) treatment of cell esds is used for estimating esds involving l.s. planes.

;

loop\_

```

_geom_bond_atom_site_label_1
_geom_bond_atom_site_label_2
_geom_bond_distance
_geom_bond_site_symmetry_2
_geom_bond_publ_flag
S5 C5 1.669(3) . ?
F42 C42 1.345(3) . ?
N1 C5 1.339(3) . ?
N1 N2 1.370(3) . ?
N1 H1 0.89(3) . ?
N2 C3 1.305(3) . ?
N4 C5 1.377(3) . ?
N4 C3 1.383(3) . ?
N4 C41 1.434(3) . ?
N62 C63 1.330(4) . ?
N62 C61 1.336(3) . ?
C3 C61 1.472(4) . ?
C41 C42 1.370(4) . ?

```

C41 C46 1.384(4) . ?  
C42 C43 1.371(4) . ?  
C43 C44 1.372(4) . ?  
C43 H43 0.9300 . ?  
C44 C45 1.378(5) . ?  
C44 H44 0.9300 . ?  
C45 C46 1.392(4) . ?  
C45 H45 0.9300 . ?  
C46 H46 0.9300 . ?  
C61 C66 1.378(4) . ?  
C63 C64 1.369(5) . ?  
C63 H63 0.9300 . ?  
C64 C65 1.365(5) . ?  
C64 H64 0.9300 . ?  
C65 C66 1.384(5) . ?  
C65 H65 0.9300 . ?  
C66 H66 0.9300 . ?

loop\_

\_geom\_angle\_atom\_site\_label\_1  
\_geom\_angle\_atom\_site\_label\_2  
\_geom\_angle\_atom\_site\_label\_3  
\_geom\_angle  
\_geom\_angle\_site\_symmetry\_1  
\_geom\_angle\_site\_symmetry\_3  
\_geom\_angle\_publ\_flag  
C5 N1 N2 113.7(2) . . ?  
C5 N1 H1 125(2) . . ?  
N2 N1 H1 121(2) . . ?  
C3 N2 N1 104.4(2) . . ?  
C5 N4 C3 108.0(2) . . ?  
C5 N4 C41 122.4(2) . . ?  
C3 N4 C41 129.3(2) . . ?  
C63 N62 C61 116.5(3) . . ?  
N2 C3 N4 110.5(2) . . ?  
N2 C3 C61 122.8(2) . . ?  
N4 C3 C61 126.7(2) . . ?  
N1 C5 N4 103.3(2) . . ?  
N1 C5 S5 129.3(2) . . ?  
N4 C5 S5 127.35(19) . . ?  
C42 C41 C46 119.7(2) . . ?  
C42 C41 N4 120.9(2) . . ?  
C46 C41 N4 119.3(2) . . ?  
F42 C42 C43 119.7(3) . . ?  
F42 C42 C41 118.1(2) . . ?  
C43 C42 C41 122.2(2) . . ?  
C42 C43 C44 118.2(3) . . ?  
C42 C43 H43 120.9 . . ?  
C44 C43 H43 120.9 . . ?  
C43 C44 C45 120.8(3) . . ?  
C43 C44 H44 119.6 . . ?

C45 C44 H44 119.6 . . ?  
C44 C45 C46 120.5(3) . . ?  
C44 C45 H45 119.8 . . ?  
C46 C45 H45 119.8 . . ?  
C41 C46 C45 118.5(3) . . ?  
C41 C46 H46 120.7 . . ?  
C45 C46 H46 120.7 . . ?  
N62 C61 C66 123.4(3) . . ?  
N62 C61 C3 117.0(2) . . ?  
C66 C61 C3 119.6(3) . . ?  
N62 C63 C64 124.4(3) . . ?  
N62 C63 H63 117.8 . . ?  
C64 C63 H63 117.8 . . ?  
C65 C64 C63 118.3(3) . . ?  
C65 C64 H64 120.9 . . ?  
C63 C64 H64 120.9 . . ?  
C64 C65 C66 119.1(3) . . ?  
C64 C65 H65 120.4 . . ?  
C66 C65 H65 120.4 . . ?  
C61 C66 C65 118.2(3) . . ?  
C61 C66 H66 120.9 . . ?  
C65 C66 H66 120.9 . . ?

loop\_

\_geom\_torsion\_atom\_site\_label\_1  
\_geom\_torsion\_atom\_site\_label\_2  
\_geom\_torsion\_atom\_site\_label\_3  
\_geom\_torsion\_atom\_site\_label\_4  
\_geom\_torsion  
\_geom\_torsion\_site\_symmetry\_1  
\_geom\_torsion\_site\_symmetry\_2  
\_geom\_torsion\_site\_symmetry\_3  
\_geom\_torsion\_site\_symmetry\_4  
\_geom\_torsion\_publ\_flag  
C5 N1 N2 C3 1.1(3) . . . . ?  
N1 N2 C3 N4 -0.3(3) . . . . ?  
N1 N2 C3 C61 -179.5(2) . . . . ?  
C5 N4 C3 N2 -0.6(3) . . . . ?  
C41 N4 C3 N2 172.4(2) . . . . ?  
C5 N4 C3 C61 178.6(3) . . . . ?  
C41 N4 C3 C61 -8.5(4) . . . . ?  
N2 N1 C5 N4 -1.4(3) . . . . ?  
N2 N1 C5 S5 177.3(2) . . . . ?  
C3 N4 C5 N1 1.2(3) . . . . ?  
C41 N4 C5 N1 -172.4(2) . . . . ?  
C3 N4 C5 S5 -177.6(2) . . . . ?  
C41 N4 C5 S5 8.9(4) . . . . ?  
C5 N4 C41 C42 -99.2(3) . . . . ?  
C3 N4 C41 C42 88.8(3) . . . . ?  
C5 N4 C41 C46 76.6(3) . . . . ?  
C3 N4 C41 C46 -95.4(3) . . . . ?



C46 C41 C42 F42 -177.9(2) . . . . ?  
N4 C41 C42 F42 -2.1(4) . . . . ?  
C46 C41 C42 C43 1.8(4) . . . . ?  
N4 C41 C42 C43 177.6(2) . . . . ?  
F42 C42 C43 C44 178.6(3) . . . . ?  
C41 C42 C43 C44 -1.1(4) . . . . ?  
C42 C43 C44 C45 0.1(5) . . . . ?  
C43 C44 C45 C46 0.1(5) . . . . ?  
C42 C41 C46 C45 -1.5(4) . . . . ?  
N4 C41 C46 C45 -177.4(3) . . . . ?  
C44 C45 C46 C41 0.6(5) . . . . ?  
C63 N62 C61 C66 -1.0(4) . . . . ?  
C63 N62 C61 C3 179.6(3) . . . . ?  
N2 C3 C61 N62 162.3(3) . . . . ?  
N4 C3 C61 N62 -16.7(4) . . . . ?  
N2 C3 C61 C66 -17.2(4) . . . . ?  
N4 C3 C61 C66 163.8(3) . . . . ?  
C61 N62 C63 C64 -0.5(5) . . . . ?  
N62 C63 C64 C65 2.0(5) . . . . ?  
C63 C64 C65 C66 -1.9(5) . . . . ?  
N62 C61 C66 C65 1.0(5) . . . . ?  
C3 C61 C66 C65 -179.6(3) . . . . ?  
C64 C65 C66 C61 0.5(5) . . . . ?

\_refine\_diff\_density\_max 0.697  
\_refine\_diff\_density\_min -0.255  
\_refine\_diff\_density\_rms 0.055

\_shelx\_res\_file

;

shelx.res created by SHELXL-2014/7

TITL t1 in P-1  
CELL 0.71073 7.0908 7.8326 12.4147 71.722 74.428 87.846  
ZERR 2.00 0.0006 0.0007 0.0010 0.008 0.007 0.007  
LATT 1  
SFAC C H N F S  
UNIT 26 18 8 2 2  
MERG 2  
FMAP 2  
PLAN -2  
ACTA  
BOND \$H  
CONF  
L.S. 40  
WGHT 0.069800 0.199700  
FVAR 3.49246  
MOLE 1  
S5 5 1.029375 -0.081877 0.833960 11.00000 0.05789 0.06767 =

0.04357 -0.02557 -0.02374 0.01970  
 F42 4 0.870932 0.298845 0.565578 11.00000 0.08746 0.06599 =  
 0.05521 -0.00812 -0.02138 -0.01763  
 N1 3 0.781519 0.118388 0.948119 11.00000 0.05813 0.05730 =  
 0.03990 -0.02147 -0.02150 0.01295  
 H1 2 0.835365 0.100618 1.007969 11.00000 -1.50000  
 N2 3 0.622858 0.222322 0.940877 11.00000 0.05927 0.05741 =  
 0.04583 -0.02388 -0.02017 0.01279  
 N4 3 0.706198 0.103198 0.796261 11.00000 0.04626 0.04200 =  
 0.03462 -0.01348 -0.01588 0.00509  
 N62 3 0.416052 0.323985 0.695349 11.00000 0.06496 0.05571 =  
 0.05748 -0.02774 -0.03159 0.02165  
 C3 1 0.578480 0.211067 0.847799 11.00000 0.04933 0.04307 =  
 0.03878 -0.01606 -0.01376 0.00594  
 C5 1 0.839460 0.045242 0.861251 11.00000 0.04872 0.04419 =  
 0.03475 -0.01199 -0.01596 0.00125  
 C41 1 0.698826 0.038488 0.701409 11.00000 0.04342 0.04316 =  
 0.03708 -0.01593 -0.01783 0.00519  
 C42 1 0.784935 0.137151 0.586726 11.00000 0.04326 0.04699 =  
 0.04447 -0.01733 -0.01788 0.00195  
 C43 1 0.786498 0.076002 0.494457 11.00000 0.05178 0.07646 =  
 0.04378 -0.02492 -0.01922 0.00999  
 AFIX 43  
 H43 2 0.843831 0.146004 0.417109 11.00000 -1.50000  
 AFIX 0  
 C44 1 0.701230 -0.091247 0.519222 11.00000 0.06868 0.07558 =  
 0.06622 -0.04337 -0.03725 0.01883  
 AFIX 43  
 H44 2 0.700961 -0.135316 0.457875 11.00000 -1.50000  
 AFIX 0  
 C45 1 0.616026 -0.194675 0.633824 11.00000 0.08043 0.05177 =  
 0.08609 -0.03173 -0.04134 0.00176  
 AFIX 43  
 H45 2 0.559036 -0.307825 0.649135 11.00000 -1.50000  
 AFIX 0  
 C46 1 0.614630 -0.131044 0.726837 11.00000 0.06452 0.04868 =  
 0.05867 -0.01688 -0.02509 -0.00209  
 AFIX 43  
 H46 2 0.558361 -0.200904 0.804367 11.00000 -1.50000  
 AFIX 0  
 C61 1 0.415255 0.305046 0.806229 11.00000 0.04988 0.03930 =  
 0.04744 -0.01497 -0.01579 0.00522  
 C63 1 0.267226 0.408015 0.658871 11.00000 0.07601 0.05880 =  
 0.07765 -0.03196 -0.04471 0.02090  
 AFIX 43  
 H63 2 0.265733 0.423433 0.581719 11.00000 -1.50000  
 AFIX 0  
 C64 1 0.116059 0.473342 0.727318 11.00000 0.05924 0.04958 =  
 0.08681 -0.01773 -0.03308 0.01410  
 AFIX 43  
 H64 2 0.013450 0.527918 0.698085 11.00000 -1.50000

AFIX 0  
C65 1 0.119857 0.456291 0.839576 11.00000 0.05961 0.05882 =  
0.07603 -0.01839 -0.00901 0.01785

AFIX 43  
H65 2 0.021400 0.502327 0.887567 11.00000 -1.50000

AFIX 0  
C66 1 0.272095 0.369626 0.881030 11.00000 0.06530 0.06014 =  
0.05142 -0.01555 -0.01259 0.01669

AFIX 43  
H66 2 0.277633 0.355350 0.957347 11.00000 -1.50000

AFIX 0  
HKLF 4

REM t1 in P-1

REM R1 = 0.0559 for 2092 Fo > 4sig(Fo) and 0.0802 for all 2845 data

REM 175 parameters refined using 0 restraints

END

WGHT 0.0651 0.2555

REM Highest difference peak 0.697, deepest hole -0.255, 1-sigma level 0.055

Q1 1 0.3191 0.3773 0.9534 11.00000 0.05 0.20

Q2 1 0.4976 0.2649 0.8239 11.00000 0.05 0.19

;

## CIF for C12

data\_shelx

\_audit\_creation\_method 'SHELXL-2014/7'

\_shelx\_SHELXL\_version\_number '2014/7'

\_chemical\_name\_systematic

;

4-(4-methoxyphenyl)-3-(3-pyridyl)-1H-1,2,4-triazole-5-thione

;

\_chemical\_name\_common ?

\_chemical\_melting\_point ?

\_chemical\_formula\_moiety 'C14 H12 N4 O S'

\_chemical\_formula\_sum 'C14 H12 N4 O S'

\_chemical\_formula\_weight 284.34

loop\_

\_atom\_type\_symbol

\_atom\_type\_description

\_atom\_type\_scatter\_dispersion\_real

\_atom\_type\_scatter\_dispersion\_imag

\_atom\_type\_scatter\_source

'C' 'C' 0.0033 0.0016

'International Tables Vol C Tables 4.2.6.8 and 6.1.1.4'

'H' 'H' 0.0000 0.0000

'International Tables Vol C Tables 4.2.6.8 and 6.1.1.4'  
'N' 'N' 0.0061 0.0033  
'International Tables Vol C Tables 4.2.6.8 and 6.1.1.4'  
'O' 'O' 0.0106 0.0060  
'International Tables Vol C Tables 4.2.6.8 and 6.1.1.4'  
'S' 'S' 0.1246 0.1234  
'International Tables Vol C Tables 4.2.6.8 and 6.1.1.4'

\_space\_group\_crystal\_system monoclinic  
\_space\_group\_IT\_number 14  
\_space\_group\_name\_H-M\_alt 'P 21/c'  
\_space\_group\_name\_Hall '-P 2ybc'

\_shelx\_space\_group\_comment

;

The symmetry employed for this shelxl refinement is uniquely defined by the following loop, which should always be used as a source of symmetry information in preference to the above space-group names.

They are only intended as comments.

;

loop\_

\_space\_group\_symop\_operation\_xyz

'x, y, z'

'-x, y+1/2, -z+1/2'

'-x, -y, -z'

'x, -y-1/2, z-1/2'

\_cell\_length\_a 9.3878(19)  
\_cell\_length\_b 9.858(2)  
\_cell\_length\_c 14.600(3)  
\_cell\_angle\_alpha 90  
\_cell\_angle\_beta 90.59(3)  
\_cell\_angle\_gamma 90  
\_cell\_volume 1351.1(5)  
\_cell\_formula\_units\_Z 4  
\_cell\_measurement\_temperature 296(2)  
\_cell\_measurement\_reflns\_used 2157  
\_cell\_measurement\_theta\_min 2.4820  
\_cell\_measurement\_theta\_max 27.8000

\_exptl\_crystal\_description needle  
\_exptl\_crystal\_colour colourless  
\_exptl\_crystal\_density\_meas ?  
\_exptl\_crystal\_density\_method ?  
\_exptl\_crystal\_density\_diffn 1.398  
\_exptl\_crystal\_F\_000 592  
\_exptl\_transmission\_factor\_min ?  
\_exptl\_transmission\_factor\_max ?  
\_exptl\_crystal\_size\_max 0.30  
\_exptl\_crystal\_size\_mid 0.10

```

_exptl_crystal_size_min      0.10
_exptl_absorpt_coefficient_mu 0.240
_shelx_estimated_absorpt_T_min ?
_shelx_estimated_absorpt_T_max ?
_exptl_absorpt_correction_T_min 0.91656
_exptl_absorpt_correction_T_max 1.00000
_exptl_absorpt_correction_type 'multi-scan'
_exptl_absorpt_process_details
;
CrysAlisPro, Agilent Technologies,
Version 1.171.37.35h (release 09-02-2015 CrysAlis171 .NET)
(compiled Feb  9 2015,16:26:32)
Empirical absorption correction using spherical harmonics,
implemented in SCALE3 ABSPACK scaling algorithm.
;
_exptl_absorpt_special_details ?
_diffrn_ambient_temperature 296(2)
_diffrn_radiation_wavelength 0.71073
_diffrn_radiation_type      MoK\alpha
_diffrn_source               ?
_diffrn_measurement_device_type 'KM4 CCD four-circle diffractometer'
_diffrn_measurement_method    '\w scans'
_diffrn_detector_area_resol_mean ?
_diffrn_reflns_number        5862
_diffrn_reflns_av_unetI/netI  0.0442
_diffrn_reflns_av_R_equivalents 0.0307
_diffrn_reflns_limit_h_min    -12
_diffrn_reflns_limit_h_max    12
_diffrn_reflns_limit_k_min    -7
_diffrn_reflns_limit_k_max    12
_diffrn_reflns_limit_l_min    -8
_diffrn_reflns_limit_l_max    19
_diffrn_reflns_theta_min      2.170
_diffrn_reflns_theta_max      29.234
_diffrn_reflns_theta_full     25.242
_diffrn_measured_fraction_theta_max 0.837
_diffrn_measured_fraction_theta_full 1.000
_diffrn_reflns_Laue_measured_fraction_max 0.837
_diffrn_reflns_Laue_measured_fraction_full 1.000
_diffrn_reflns_point_group_measured_fraction_max 0.837
_diffrn_reflns_point_group_measured_fraction_full 1.000
_reflns_number_total          3073
_reflns_number_gt             2286
_reflns_threshold_expression   'I > 2\sigma(I)'
_reflns_Friedel_coverage      0.000
_reflns_Friedel_fraction_max  .
_reflns_Friedel_fraction_full .

_reflns_special_details
;
Reflections were merged by SHELXL according to the crystal

```

class for the calculation of statistics and refinement.

\_reflns\_Friedel\_fraction is defined as the number of unique Friedel pairs measured divided by the number that would be possible theoretically, ignoring centric projections and systematic absences.

;

\_computing\_data\_collection

;

CrysAlisPro, Agilent Technologies,  
Version 1.171.37.35h (release 09-02-2015 CrysAlis171 .NET)  
(compiled Feb 9 2015,16:26:32)

;

\_computing\_cell\_refinement

;

CrysAlisPro, Agilent Technologies,  
Version 1.171.37.35h (release 09-02-2015 CrysAlis171 .NET)  
(compiled Feb 9 2015,16:26:32)

;

\_computing\_data\_reduction

;

CrysAlisPro, Agilent Technologies,  
Version 1.171.37.35h (release 09-02-2015 CrysAlis171 .NET)  
(compiled Feb 9 2015,16:26:32)

;

\_computing\_structure\_solution 'SHELXS-2013/1 (Sheldrick, 2013)'  
\_computing\_structure\_refinement 'SHELXL-2014/7 (Sheldrick, 2014)'  
\_computing\_molecular\_graphics 'ORTEP3 for Windows (Farrugia, 2012)'  
\_computing\_publication\_material

;

SHELXL-2014/7 (Sheldrick, 2014) and WINGX (Farrugia, 2012)

;

\_refine\_special\_details ?

\_refine\_ls\_structure\_factor\_coef Fsqd

\_refine\_ls\_matrix\_type full

\_refine\_ls\_weighting\_scheme calc

\_refine\_ls\_weighting\_details

'w=1/[ $s^2(F_o^2)+(0.0479P)^2+0.4399P$ ] where  $P=(F_o^2+2F_c^2)/3$ '

\_atom\_sites\_solution\_primary refxyz

\_atom\_sites\_solution\_secondary ?

\_atom\_sites\_solution\_hydrogens mixed

\_refine\_ls\_hydrogen\_treatment mixed

\_refine\_ls\_extinction\_method none

\_refine\_ls\_extinction\_coef .

\_refine\_ls\_number\_reflns 3073

\_refine\_ls\_number\_parameters 184

\_refine\_ls\_number\_restraints 0

\_refine\_ls\_R\_factor\_all 0.0661

\_refine\_ls\_R\_factor\_gt 0.0423

\_refine\_ls\_wR\_factor\_ref 0.1259

\_refine\_ls\_wR\_factor\_gt 0.0958  
\_refine\_ls\_goodness\_of\_fit\_ref 1.113  
\_refine\_ls\_restrained\_S\_all 1.113  
\_refine\_ls\_shift/su\_max 0.000  
\_refine\_ls\_shift/su\_mean 0.000

loop\_

\_atom\_site\_label  
\_atom\_site\_type\_symbol  
\_atom\_site\_fract\_x  
\_atom\_site\_fract\_y  
\_atom\_site\_fract\_z  
\_atom\_site\_U\_iso\_or\_equiv  
\_atom\_site\_adp\_type  
\_atom\_site\_occupancy  
\_atom\_site\_site\_symmetry\_order  
\_atom\_site\_calc\_flag  
\_atom\_site\_refinement\_flags\_posn  
\_atom\_site\_refinement\_flags\_adp  
\_atom\_site\_refinement\_flags\_occupancy  
\_atom\_site\_disorder\_assembly  
\_atom\_site\_disorder\_group  
S5 S 0.24115(7) 0.56484(6) 0.16270(4) 0.04008(19) Uani 1 1 d . . . . .  
O47 O -0.0266(2) 0.99272(19) -0.14262(14) 0.0608(5) Uani 1 1 d . . . . .  
N1 N 0.3579(2) 0.37414(18) 0.05440(12) 0.0333(4) Uani 1 1 d . . . . .  
H1 H 0.369(3) 0.310(3) 0.0997(17) 0.050 Uiso 1 1 d . U . . .  
N2 N 0.3863(2) 0.34250(17) -0.03527(12) 0.0339(4) Uani 1 1 d . . . . .  
N4 N 0.27969(18) 0.54222(16) -0.02347(11) 0.0281(4) Uani 1 1 d . . . . .  
N63 N 0.3873(2) 0.34019(18) -0.32216(12) 0.0375(4) Uani 1 1 d . . . . .  
C3 C 0.3377(2) 0.44692(19) -0.08155(13) 0.0280(4) Uani 1 1 d . . . . .  
C5 C 0.2930(2) 0.4941(2) 0.06514(14) 0.0293(4) Uani 1 1 d . . . . .  
C41 C 0.2016(2) 0.6621(2) -0.05053(13) 0.0291(4) Uani 1 1 d . . . . .  
C42 C 0.2628(2) 0.7883(2) -0.04163(14) 0.0345(5) Uani 1 1 d . . . . .  
H42 H 0.3530 0.7971 -0.0153 0.052 Uiso 1 1 calc R U . . .  
C43 C 0.1897(3) 0.9026(2) -0.07196(16) 0.0405(5) Uani 1 1 d . . . . .  
H43 H 0.2306 0.9881 -0.0660 0.061 Uiso 1 1 calc R U . . .  
C44 C 0.0556(3) 0.8883(2) -0.11120(16) 0.0408(6) Uani 1 1 d . . . . .  
C45 C -0.0042(3) 0.7602(3) -0.11995(17) 0.0459(6) Uani 1 1 d . . . . .  
H45 H -0.0940 0.7507 -0.1466 0.069 Uiso 1 1 calc R U . . .  
C46 C 0.0678(2) 0.6474(2) -0.08960(16) 0.0397(5) Uani 1 1 d . . . . .  
H46 H 0.0269 0.5618 -0.0953 0.060 Uiso 1 1 calc R U . . .  
C48 C 0.0307(3) 1.1257(3) -0.1398(2) 0.0671(9) Uani 1 1 d . . . . .  
H481 H 0.1109 1.1311 -0.1799 0.101 Uiso 1 1 calc R U . . .  
H482 H 0.0607 1.1466 -0.0783 0.101 Uiso 1 1 calc R U . . .  
H483 H -0.0408 1.1894 -0.1592 0.101 Uiso 1 1 calc R U . . .  
C61 C 0.3524(2) 0.45924(19) -0.18097(13) 0.0280(4) Uani 1 1 d . . . . .  
C62 C 0.3647(2) 0.3412(2) -0.23250(14) 0.0338(5) Uani 1 1 d . . . . .  
H62 H 0.3565 0.2584 -0.2025 0.051 Uiso 1 1 calc R U . . .  
C64 C 0.3957(3) 0.4603(2) -0.36444(15) 0.0404(6) Uani 1 1 d . . . . .  
H64 H 0.4110 0.4612 -0.4273 0.061 Uiso 1 1 calc R U . . .  
C65 C 0.3828(3) 0.5820(2) -0.32007(15) 0.0415(6) Uani 1 1 d . . . . .

H65 H 0.3886 0.6632 -0.3523 0.062 Uiso 1 1 calc R U . . .  
C66 C 0.3611(3) 0.5820(2) -0.22687(15) 0.0361(5) Uani 1 1 d . . . . .  
H66 H 0.3523 0.6634 -0.1952 0.054 Uiso 1 1 calc R U . . .

loop\_

\_atom\_site\_aniso\_label  
\_atom\_site\_aniso\_U\_11  
\_atom\_site\_aniso\_U\_22  
\_atom\_site\_aniso\_U\_33  
\_atom\_site\_aniso\_U\_23  
\_atom\_site\_aniso\_U\_13  
\_atom\_site\_aniso\_U\_12

S5 0.0534(4) 0.0410(3) 0.0260(3) -0.0038(2) 0.0077(2) -0.0020(3)  
O47 0.0589(12) 0.0503(11) 0.0732(14) 0.0149(10) -0.0022(10) 0.0226(10)  
N1 0.0471(11) 0.0299(9) 0.0229(9) 0.0053(7) 0.0032(8) 0.0020(8)  
N2 0.0459(11) 0.0290(9) 0.0269(9) 0.0028(7) 0.0043(8) 0.0035(8)  
N4 0.0357(9) 0.0265(9) 0.0221(8) 0.0001(7) 0.0016(7) 0.0021(7)  
N63 0.0511(12) 0.0339(10) 0.0276(9) -0.0050(8) 0.0004(8) 0.0008(9)  
C3 0.0341(11) 0.0251(10) 0.0248(10) -0.0010(8) 0.0016(8) -0.0004(8)  
C5 0.0333(11) 0.0280(10) 0.0265(10) 0.0022(8) 0.0013(8) -0.0039(9)  
C41 0.0356(11) 0.0287(10) 0.0230(9) 0.0000(8) 0.0027(8) 0.0034(9)  
C42 0.0390(12) 0.0321(11) 0.0325(11) -0.0023(9) -0.0036(9) 0.0001(10)  
C43 0.0506(14) 0.0302(12) 0.0409(13) -0.0005(10) 0.0001(11) 0.0032(10)  
C44 0.0442(13) 0.0419(13) 0.0364(12) 0.0049(10) 0.0043(10) 0.0153(11)  
C45 0.0349(12) 0.0517(15) 0.0509(15) 0.0034(12) -0.0058(11) 0.0044(11)  
C46 0.0358(12) 0.0388(12) 0.0445(13) -0.0012(10) -0.0012(10) -0.0034(10)  
C48 0.086(2) 0.0478(17) 0.068(2) 0.0187(14) 0.0159(16) 0.0275(16)  
C61 0.0335(11) 0.0274(10) 0.0231(10) -0.0007(8) 0.0006(8) -0.0003(9)  
C62 0.0441(12) 0.0280(11) 0.0293(11) 0.0001(9) 0.0014(9) -0.0001(10)  
C64 0.0555(15) 0.0424(13) 0.0233(10) -0.0025(9) 0.0023(10) 0.0020(11)  
C65 0.0632(16) 0.0321(12) 0.0293(11) 0.0037(9) 0.0036(10) 0.0013(11)  
C66 0.0544(14) 0.0268(11) 0.0273(11) -0.0018(8) 0.0021(10) 0.0008(10)

\_geom\_special\_details

;

All esds (except the esd in the dihedral angle between two l.s. planes) are estimated using the full covariance matrix. The cell esds are taken into account individually in the estimation of esds in distances, angles and torsion angles; correlations between esds in cell parameters are only used when they are defined by crystal symmetry. An approximate (isotropic) treatment of cell esds is used for estimating esds involving l.s. planes.

;

loop\_

\_geom\_bond\_atom\_site\_label\_1  
\_geom\_bond\_atom\_site\_label\_2  
\_geom\_bond\_distance  
\_geom\_bond\_site\_symmetry\_2  
\_geom\_bond\_publ\_flag  
S5 C5 1.663(2) . ?  
O47 C44 1.363(3) . ?



O47 C48 1.417(4) . ?  
N1 C5 1.340(3) . ?  
N1 N2 1.375(2) . ?  
N1 H1 0.92(3) . ?  
N2 C3 1.311(2) . ?  
N4 C3 1.381(2) . ?  
N4 C5 1.383(2) . ?  
N4 C41 1.443(2) . ?  
N63 C62 1.328(3) . ?  
N63 C64 1.338(3) . ?  
C3 C61 1.465(3) . ?  
C41 C42 1.376(3) . ?  
C41 C46 1.382(3) . ?  
C42 C43 1.389(3) . ?  
C42 H42 0.9300 . ?  
C43 C44 1.385(3) . ?  
C43 H43 0.9300 . ?  
C44 C45 1.387(3) . ?  
C45 C46 1.373(3) . ?  
C45 H45 0.9300 . ?  
C46 H46 0.9300 . ?  
C48 H481 0.9600 . ?  
C48 H482 0.9600 . ?  
C48 H483 0.9600 . ?  
C61 C66 1.386(3) . ?  
C61 C62 1.391(3) . ?  
C62 H62 0.9300 . ?  
C64 C65 1.370(3) . ?  
C64 H64 0.9300 . ?  
C65 C66 1.378(3) . ?  
C65 H65 0.9300 . ?  
C66 H66 0.9300 . ?

loop\_

\_geom\_angle\_atom\_site\_label\_1  
\_geom\_angle\_atom\_site\_label\_2  
\_geom\_angle\_atom\_site\_label\_3  
\_geom\_angle  
\_geom\_angle\_site\_symmetry\_1  
\_geom\_angle\_site\_symmetry\_3  
\_geom\_angle\_publ\_flag  
C44 O47 C48 118.4(2) . . ?  
C5 N1 N2 113.87(17) . . ?  
C5 N1 H1 125.0(16) . . ?  
N2 N1 H1 120.3(16) . . ?  
C3 N2 N1 104.05(16) . . ?  
C3 N4 C5 107.99(16) . . ?  
C3 N4 C41 126.23(16) . . ?  
C5 N4 C41 125.29(16) . . ?  
C62 N63 C64 117.30(18) . . ?  
N2 C3 N4 110.79(17) . . ?

N2 C3 C61 122.69(18) . . ?  
N4 C3 C61 126.44(17) . . ?  
N1 C5 N4 103.30(17) . . ?  
N1 C5 S5 127.42(16) . . ?  
N4 C5 S5 129.29(16) . . ?  
C42 C41 C46 120.7(2) . . ?  
C42 C41 N4 120.29(18) . . ?  
C46 C41 N4 118.93(19) . . ?  
C41 C42 C43 119.9(2) . . ?  
C41 C42 H42 120.0 . . ?  
C43 C42 H42 120.0 . . ?  
C44 C43 C42 119.6(2) . . ?  
C44 C43 H43 120.2 . . ?  
C42 C43 H43 120.2 . . ?  
O47 C44 C43 124.9(2) . . ?  
O47 C44 C45 115.4(2) . . ?  
C43 C44 C45 119.7(2) . . ?  
C46 C45 C44 120.7(2) . . ?  
C46 C45 H45 119.6 . . ?  
C44 C45 H45 119.6 . . ?  
C45 C46 C41 119.4(2) . . ?  
C45 C46 H46 120.3 . . ?  
C41 C46 H46 120.3 . . ?  
O47 C48 H481 109.5 . . ?  
O47 C48 H482 109.5 . . ?  
H481 C48 H482 109.5 . . ?  
O47 C48 H483 109.5 . . ?  
H481 C48 H483 109.5 . . ?  
H482 C48 H483 109.5 . . ?  
C66 C61 C62 117.59(19) . . ?  
C66 C61 C3 123.93(18) . . ?  
C62 C61 C3 118.41(18) . . ?  
N63 C62 C61 123.65(19) . . ?  
N63 C62 H62 118.2 . . ?  
C61 C62 H62 118.2 . . ?  
N63 C64 C65 123.5(2) . . ?  
N63 C64 H64 118.3 . . ?  
C65 C64 H64 118.3 . . ?  
C64 C65 C66 118.8(2) . . ?  
C64 C65 H65 120.6 . . ?  
C66 C65 H65 120.6 . . ?  
C65 C66 C61 119.19(19) . . ?  
C65 C66 H66 120.4 . . ?  
C61 C66 H66 120.4 . . ?

loop\_

\_geom\_torsion\_atom\_site\_label\_1  
\_geom\_torsion\_atom\_site\_label\_2  
\_geom\_torsion\_atom\_site\_label\_3  
\_geom\_torsion\_atom\_site\_label\_4  
\_geom\_torsion

\_geom\_torsion\_site\_symmetry\_1  
 \_geom\_torsion\_site\_symmetry\_2  
 \_geom\_torsion\_site\_symmetry\_3  
 \_geom\_torsion\_site\_symmetry\_4  
 \_geom\_torsion\_publ\_flag  
 C5 N1 N2 C3 0.3(2) . . . . ?  
 N1 N2 C3 N4 -0.1(2) . . . . ?  
 N1 N2 C3 C61 176.84(18) . . . . ?  
 C5 N4 C3 N2 0.0(2) . . . . ?  
 C41 N4 C3 N2 -172.29(18) . . . . ?  
 C5 N4 C3 C61 -176.85(19) . . . . ?  
 C41 N4 C3 C61 10.9(3) . . . . ?  
 N2 N1 C5 N4 -0.3(2) . . . . ?  
 N2 N1 C5 S5 179.40(16) . . . . ?  
 C3 N4 C5 N1 0.2(2) . . . . ?  
 C41 N4 C5 N1 172.53(18) . . . . ?  
 C3 N4 C5 S5 -179.49(16) . . . . ?  
 C41 N4 C5 S5 -7.1(3) . . . . ?  
 C3 N4 C41 C42 -107.4(2) . . . . ?  
 C5 N4 C41 C42 81.6(3) . . . . ?  
 C3 N4 C41 C46 69.4(3) . . . . ?  
 C5 N4 C41 C46 -101.6(2) . . . . ?  
 C46 C41 C42 C43 0.1(3) . . . . ?  
 N4 C41 C42 C43 176.85(19) . . . . ?  
 C41 C42 C43 C44 -0.1(3) . . . . ?  
 C48 O47 C44 C43 3.4(4) . . . . ?  
 C48 O47 C44 C45 -177.0(2) . . . . ?  
 C42 C43 C44 O47 179.4(2) . . . . ?  
 C42 C43 C44 C45 -0.1(4) . . . . ?  
 O47 C44 C45 C46 -179.2(2) . . . . ?  
 C43 C44 C45 C46 0.4(4) . . . . ?  
 C44 C45 C46 C41 -0.4(4) . . . . ?  
 C42 C41 C46 C45 0.2(3) . . . . ?  
 N4 C41 C46 C45 -176.6(2) . . . . ?  
 N2 C3 C61 C66 -151.1(2) . . . . ?  
 N4 C3 C61 C66 25.4(3) . . . . ?  
 N2 C3 C61 C62 26.0(3) . . . . ?  
 N4 C3 C61 C62 -157.5(2) . . . . ?  
 C64 N63 C62 C61 -1.4(3) . . . . ?  
 C66 C61 C62 N63 1.6(3) . . . . ?  
 C3 C61 C62 N63 -175.7(2) . . . . ?  
 C62 N63 C64 C65 0.3(4) . . . . ?  
 N63 C64 C65 C66 0.5(4) . . . . ?  
 C64 C65 C66 C61 -0.2(4) . . . . ?  
 C62 C61 C66 C65 -0.8(3) . . . . ?  
 C3 C61 C66 C65 176.4(2) . . . . ?  
  
 \_refine\_diff\_density\_max 0.206  
 \_refine\_diff\_density\_min -0.252  
 \_refine\_diff\_density\_rms 0.055

\_shelx\_res\_file

;

shelx.res created by SHELXL-2014/7

TITL T15 in P2(1)/c  
CELL 0.71073 9.3878 9.8576 14.6003 90.000 90.586 90.000  
ZERR 4.00 0.0019 0.0020 0.0029 0.000 0.030 0.000  
LATT 1  
SYMM - X, 1/2 + Y, 1/2 - Z  
SFAC C H N O S  
UNIT 56 48 16 4 4  
MERG 2  
FMAP 2  
PLAN -2  
ACTA  
BOND \$H  
CONF  
L.S. 40  
WGHT 0.047900 0.439900  
FVAR 1.59215  
MOLE 1  
S5 5 0.241152 0.564845 0.162700 11.00000 0.05339 0.04096 =  
0.02604 -0.00377 0.00773 -0.00204  
O47 4 -0.026586 0.992715 -0.142623 11.00000 0.05889 0.05028 =  
0.07318 0.01492 -0.00225 0.02259  
N1 3 0.357904 0.374142 0.054397 11.00000 0.04710 0.02993 =  
0.02291 0.00527 0.00323 0.00204  
H1 2 0.369350 0.309782 0.099680 11.00000 -1.50000  
N2 3 0.386303 0.342496 -0.035267 11.00000 0.04595 0.02904 =  
0.02690 0.00284 0.00432 0.00353  
N4 3 0.279690 0.542218 -0.023475 11.00000 0.03566 0.02649 =  
0.02208 0.00014 0.00163 0.00210  
N63 3 0.387341 0.340187 -0.322163 11.00000 0.05106 0.03387 =  
0.02761 -0.00500 0.00038 0.00076  
C3 1 0.337663 0.446921 -0.081553 11.00000 0.03413 0.02508 =  
0.02476 -0.00100 0.00160 -0.00037  
C5 1 0.292966 0.494086 0.065143 11.00000 0.03331 0.02804 =  
0.02653 0.00218 0.00134 -0.00394  
C41 1 0.201632 0.662100 -0.050534 11.00000 0.03558 0.02868 =  
0.02301 0.00005 0.00271 0.00335  
C42 1 0.262786 0.788329 -0.041629 11.00000 0.03895 0.03207 =  
0.03247 -0.00233 -0.00359 0.00007  
AFIX 43  
H42 2 0.352954 0.797135 -0.015326 11.00000 -1.50000  
AFIX 0  
C43 1 0.189724 0.902553 -0.071958 11.00000 0.05058 0.03017 =  
0.04085 -0.00051 0.00005 0.00319  
AFIX 43  
H43 2 0.230592 0.988077 -0.065969 11.00000 -1.50000  
AFIX 0

C44 1 0.055558 0.888310 -0.111198 11.00000 0.04418 0.04186 =  
 0.03640 0.00489 0.00432 0.01531  
 C45 1 -0.004195 0.760236 -0.119947 11.00000 0.03493 0.05173 =  
 0.05091 0.00339 -0.00576 0.00438  
 AFIX 43  
 H45 2 -0.094001 0.750701 -0.146650 11.00000 -1.50000  
 AFIX 0  
 C46 1 0.067824 0.647373 -0.089604 11.00000 0.03575 0.03879 =  
 0.04446 -0.00124 -0.00119 -0.00336  
 AFIX 43  
 H46 2 0.026942 0.561813 -0.095292 11.00000 -1.50000  
 AFIX 0  
 C48 1 0.030683 1.125674 -0.139791 11.00000 0.08629 0.04775 =  
 0.06765 0.01866 0.01585 0.02747  
 AFIX 133  
 H481 2 0.110898 1.131086 -0.179885 11.00000 -1.50000  
 H482 2 0.060705 1.146565 -0.078342 11.00000 -1.50000  
 H483 2 -0.040756 1.189446 -0.159228 11.00000 -1.50000  
 AFIX 0  
 C61 1 0.352409 0.459245 -0.180969 11.00000 0.03346 0.02739 =  
 0.02313 -0.00070 0.00062 -0.00035  
 C62 1 0.364652 0.341192 -0.232504 11.00000 0.04409 0.02796 =  
 0.02932 0.00007 0.00141 -0.00009  
 AFIX 43  
 H62 2 0.356498 0.258362 -0.202517 11.00000 -1.50000  
 AFIX 0  
 C64 1 0.395672 0.460308 -0.364436 11.00000 0.05551 0.04241 =  
 0.02329 -0.00254 0.00229 0.00200  
 AFIX 43  
 H64 2 0.411014 0.461188 -0.427261 11.00000 -1.50000  
 AFIX 0  
 C65 1 0.382798 0.582040 -0.320073 11.00000 0.06324 0.03215 =  
 0.02927 0.00372 0.00358 0.00126  
 AFIX 43  
 H65 2 0.388619 0.663233 -0.352256 11.00000 -1.50000  
 AFIX 0  
 C66 1 0.361063 0.582008 -0.226874 11.00000 0.05436 0.02684 =  
 0.02725 -0.00178 0.00210 0.00077  
 AFIX 43  
 H66 2 0.352308 0.663354 -0.195163 11.00000 -1.50000  
 AFIX 0  
 HKLF 4

REM T15 in P2(1)/c

REM R1 = 0.0423 for 2286 Fo > 4sig(Fo) and 0.0661 for all 3073 data

REM 184 parameters refined using 0 restraints

END

WGHT 0.0547 0.2965

REM Highest difference peak 0.206, deepest hole -0.252, 1-sigma level 0.055

Q1 1 0.0116 0.8229 -0.0904 11.00000 0.05 0.21

Q2 1 0.1945 0.9996 -0.0164 11.00000 0.05 0.19

;

### CIF for C13

data\_shelx

\_audit\_creation\_method 'SHELXL-2014/7'

\_shelx\_SHELXL\_version\_number '2014/7'

\_chemical\_name\_systematic

;

4-(2,4-dichlorophenyl)-3-(4-pyridylmethyl)-1H-1,2,4-triazole-5-thione

;

\_chemical\_name\_common ?

\_chemical\_melting\_point ?

\_chemical\_formula\_moiety 'C14 H10 Cl2 N4 S'

\_chemical\_formula\_sum 'C14 H10 Cl2 N4 S'

\_chemical\_formula\_weight 337.22

loop\_

\_atom\_type\_symbol

\_atom\_type\_description

\_atom\_type\_scatter\_dispersion\_real

\_atom\_type\_scatter\_dispersion\_imag

\_atom\_type\_scatter\_source

'C' 'C' 0.0033 0.0016

'International Tables Vol C Tables 4.2.6.8 and 6.1.1.4'

'H' 'H' 0.0000 0.0000

'International Tables Vol C Tables 4.2.6.8 and 6.1.1.4'

'N' 'N' 0.0061 0.0033

'International Tables Vol C Tables 4.2.6.8 and 6.1.1.4'

'S' 'S' 0.1246 0.1234

'International Tables Vol C Tables 4.2.6.8 and 6.1.1.4'

'Cl' 'Cl' 0.1484 0.1585

'International Tables Vol C Tables 4.2.6.8 and 6.1.1.4'

\_space\_group\_crystal\_system triclinic

\_space\_group\_IT\_number 2

\_space\_group\_name\_H-M\_alt 'P -1'

\_space\_group\_name\_Hall '-P 1'

\_shelx\_space\_group\_comment

;

The symmetry employed for this shelxl refinement is uniquely defined by the following loop, which should always be used as a source of symmetry information in preference to the above space-group names.

They are only intended as comments.

;

```

loop_
  _space_group_symop_operation_xyz
  'x, y, z'
  '-x, -y, -z'

_cell_length_a      8.4234(10)
_cell_length_b      8.8584(9)
_cell_length_c      11.251(2)
_cell_angle_alpha   81.356(13)
_cell_angle_beta    83.534(12)
_cell_angle_gamma   66.032(11)
_cell_volume        757.21(19)
_cell_formula_units_Z      2
_cell_measurement_temperature  296(2)
_cell_measurement_reflns_used  1947
_cell_measurement_theta_min    1.8070
_cell_measurement_theta_max    26.5620

_exptl_crystal_description  block
_exptl_crystal_colour       colourless
_exptl_crystal_density_meas  ?
_exptl_crystal_density_method  ?
_exptl_crystal_density_diffn  1.479
_exptl_crystal_F_000        344
_exptl_transmission_factor_min  ?
_exptl_transmission_factor_max  ?
_exptl_crystal_size_max     0.40
_exptl_crystal_size_mid     0.40
_exptl_crystal_size_min     0.10
_exptl_absorpt_coefficient_mu  0.564
_shelx_estimated_absorpt_T_min  ?
_shelx_estimated_absorpt_T_max  ?
_exptl_absorpt_correction_T_min  0.88389
_exptl_absorpt_correction_T_max  1.00000
_exptl_absorpt_correction_type  'multi-scan'
_exptl_absorpt_process_details
;
CrysAlisPro, Agilent Technologies,
Version 1.171.37.35h (release 09-02-2015 CrysAlis171 .NET)
(compiled Feb 9 2015,16:26:32)
Empirical absorption correction using spherical harmonics,
implemented in SCALE3 ABSPACK scaling algorithm.
;
_exptl_absorpt_special_details  ?
_diffn_ambient_temperature      296(2)
_diffn_radiation_wavelength     0.71073
_diffn_radiation_type           MoK\alpha
_diffn_source                    ?
_diffn_measurement_device_type  'KM4 CCD four-circle diffractometer'
_diffn_measurement_method       '\w scans'
_diffn_detector_area_resol_mean  ?

```

```

_diffrn_reflms_number      4996
_diffrn_reflms_av_unetI/netI  0.0628
_diffrn_reflms_av_R_equivalents  ?
_diffrn_reflms_limit_h_min   -11
_diffrn_reflms_limit_h_max    11
_diffrn_reflms_limit_k_min   -11
_diffrn_reflms_limit_k_max    11
_diffrn_reflms_limit_l_min   -14
_diffrn_reflms_limit_l_max    14
_diffrn_reflms_theta_min     1.834
_diffrn_reflms_theta_max     28.932
_diffrn_reflms_theta_full    25.242
_diffrn_measured_fraction_theta_max 0.871
_diffrn_measured_fraction_theta_full 1.000
_diffrn_reflms_Laue_measured_fraction_max 0.871
_diffrn_reflms_Laue_measured_fraction_full 1.000
_diffrn_reflms_point_group_measured_fraction_max 0.871
_diffrn_reflms_point_group_measured_fraction_full 1.000
_reflms_number_total        4996
_reflms_number_gt           3212
_reflms_threshold_expression 'I > 2\sqrt(I)'
_reflms_Friedel_coverage    0.000
_reflms_Friedel_fraction_max .
_reflms_Friedel_fraction_full .

_reflms_special_details
;
_reflms_Friedel_fraction is defined as the number of unique
Friedel pairs measured divided by the number that would be
possible theoretically, ignoring centric projections and
systematic absences.
;

_computing_data_collection
;
CrysAlisPro, Agilent Technologies,
Version 1.171.37.35h (release 09-02-2015 CrysAlis171 .NET)
(compiled Feb 9 2015,16:26:32)
;
_computing_cell_refinement
;
CrysAlisPro, Agilent Technologies,
Version 1.171.37.35h (release 09-02-2015 CrysAlis171 .NET)
(compiled Feb 9 2015,16:26:32)
;
_computing_data_reduction
;
CrysAlisPro, Agilent Technologies,
Version 1.171.37.35h (release 09-02-2015 CrysAlis171 .NET)
(compiled Feb 9 2015,16:26:32)
;

```



```

_computing_structure_solution 'SHELXS-2013/1 (Sheldrick, 2013)'
_computing_structure_refinement 'SHELXL-2014/7 (Sheldrick, 2014)'
_computing_molecular_graphics 'ORTEP3 for Windows (Farrugia, 2012)'
_computing_publication_material
;
SHELXL-2014/7 (Sheldrick, 2014) and WINGX (Farrugia, 2012)
;
_refine_special_details
;
Refined as a 2-component twin.
;
_refine_ls_structure_factor_coef Fsqd
_refine_ls_matrix_type full
_refine_ls_weighting_scheme calc
_refine_ls_weighting_details
'w=1/[\s^2^(Fo^2^)+(0.0582P)^2^] where P=(Fo^2^+2Fc^2^)/3'
_atom_sites_solution_primary refxyz
_atom_sites_solution_secondary ?
_atom_sites_solution_hydrogens mixed
_refine_ls_hydrogen_treatment mixed
_refine_ls_extinction_method 'SHELXL-2014/7 (Sheldrick 2014)'
_refine_ls_extinction_coef 0.019(4)
_refine_ls_extinction_expression
'Fc^*^=kFc[1+0.001xFc^2^/sin(2\q)]^-1/4^'
_refine_ls_number_reflns 4996
_refine_ls_number_parameters 195
_refine_ls_number_restraints 0
_refine_ls_R_factor_all 0.0666
_refine_ls_R_factor_gt 0.0397
_refine_ls_wR_factor_ref 0.1079
_refine_ls_wR_factor_gt 0.1025
_refine_ls_goodness_of_fit_ref 0.903
_refine_ls_restrained_S_all 0.903
_refine_ls_shift/su_max 0.000
_refine_ls_shift/su_mean 0.000

loop_
_atom_site_label
_atom_site_type_symbol
_atom_site_fract_x
_atom_site_fract_y
_atom_site_fract_z
_atom_site_U_iso_or_equiv
_atom_site_adp_type
_atom_site_occupancy
_atom_site_site_symmetry_order
_atom_site_calc_flag
_atom_site_refinement_flags_posn
_atom_site_refinement_flags_adp
_atom_site_refinement_flags_occupancy
_atom_site_disorder_assembly

```

\_atom\_site\_disorder\_group  
 Cl42 Cl 0.00899(11) 0.27775(10) 0.11464(7) 0.0529(3) Uani 1 1 d . . . . .  
 Cl44 Cl 0.26017(13) -0.21174(9) 0.47456(8) 0.0683(3) Uani 1 1 d . . . . .  
 S5 S -0.29281(10) 0.59255(11) 0.30994(8) 0.0534(3) Uani 1 1 d . . . . .  
 N1 N -0.0820(3) 0.7488(3) 0.2145(2) 0.0410(6) Uani 1 1 d . . . . .  
 H1 H -0.177(4) 0.858(4) 0.193(3) 0.062 Uiso 1 1 d . U . . .  
 N2 N 0.0913(3) 0.7240(3) 0.1962(2) 0.0429(6) Uani 1 1 d . . . . .  
 N4 N 0.0604(3) 0.4946(2) 0.27551(19) 0.0314(6) Uani 1 1 d . . . . .  
 N63 N 0.6761(3) 0.0727(3) 0.1457(3) 0.0576(8) Uani 1 1 d . . . . .  
 C3 C 0.1758(4) 0.5688(3) 0.2346(3) 0.0349(7) Uani 1 1 d . . . . .  
 C5 C -0.1071(4) 0.6134(3) 0.2644(2) 0.0362(7) Uani 1 1 d . . . . .  
 C31 C 0.3676(4) 0.4853(3) 0.2409(3) 0.0439(8) Uani 1 1 d . . . . .  
 H311 H 0.3943 0.4422 0.3240 0.066 Uiso 1 1 calc R U . . .  
 H312 H 0.4169 0.5676 0.2165 0.066 Uiso 1 1 calc R U . . .  
 C41 C 0.1081(4) 0.3230(3) 0.3227(2) 0.0334(7) Uani 1 1 d . . . . .  
 C42 C 0.0891(4) 0.2125(3) 0.2562(3) 0.0360(7) Uani 1 1 d . . . . .  
 C43 C 0.1371(4) 0.0472(3) 0.3023(3) 0.0441(8) Uani 1 1 d . . . . .  
 H43 H 0.1234 -0.0274 0.2585 0.066 Uiso 1 1 calc R U . . .  
 C44 C 0.2054(4) -0.0054(3) 0.4136(3) 0.0465(8) Uani 1 1 d . . . . .  
 C45 C 0.2273(4) 0.1025(4) 0.4804(3) 0.0543(9) Uani 1 1 d . . . . .  
 H45 H 0.2750 0.0650 0.5553 0.081 Uiso 1 1 calc R U . . .  
 C46 C 0.1769(4) 0.2677(4) 0.4336(3) 0.0448(8) Uani 1 1 d . . . . .  
 H46 H 0.1897 0.3422 0.4779 0.067 Uiso 1 1 calc R U . . .  
 C61 C 0.4547(3) 0.3447(3) 0.1641(3) 0.0353(7) Uani 1 1 d . . . . .  
 C62 C 0.5869(4) 0.2000(4) 0.2084(3) 0.0486(8) Uani 1 1 d . . . . .  
 H62 H 0.6154 0.1911 0.2874 0.073 Uiso 1 1 calc R U . . .  
 C64 C 0.6335(5) 0.0882(4) 0.0334(4) 0.0595(10) Uani 1 1 d . . . . .  
 H64 H 0.6953 0.0008 -0.0121 0.089 Uiso 1 1 calc R U . . .  
 C65 C 0.5033(5) 0.2257(4) -0.0198(3) 0.0570(10) Uani 1 1 d . . . . .  
 H65 H 0.4767 0.2312 -0.0988 0.085 Uiso 1 1 calc R U . . .  
 C66 C 0.4135(4) 0.3551(4) 0.0480(3) 0.0475(8) Uani 1 1 d . . . . .  
 H66 H 0.3245 0.4500 0.0147 0.071 Uiso 1 1 calc R U . . .

loop\_

\_atom\_site\_aniso\_label  
 \_atom\_site\_aniso\_U\_11  
 \_atom\_site\_aniso\_U\_22  
 \_atom\_site\_aniso\_U\_33  
 \_atom\_site\_aniso\_U\_23  
 \_atom\_site\_aniso\_U\_13  
 \_atom\_site\_aniso\_U\_12  
 Cl42 0.0638(6) 0.0486(5) 0.0469(5) -0.0087(4) -0.0159(4) -0.0184(4)  
 Cl44 0.0888(8) 0.0345(5) 0.0711(6) 0.0088(4) -0.0027(5) -0.0192(5)  
 S5 0.0338(5) 0.0647(6) 0.0644(6) -0.0103(5) -0.0028(4) -0.0211(4)  
 N1 0.0307(15) 0.0252(14) 0.0610(18) -0.0079(12) -0.0058(13) -0.0029(12)  
 N2 0.0355(15) 0.0261(14) 0.0663(18) -0.0085(12) -0.0017(13) -0.0106(12)  
 N4 0.0280(13) 0.0239(12) 0.0431(14) -0.0052(10) -0.0061(11) -0.0097(11)  
 N63 0.0444(18) 0.0308(15) 0.083(2) -0.0055(15) -0.0057(16) -0.0003(13)  
 C3 0.0313(17) 0.0270(16) 0.0488(19) -0.0097(13) -0.0042(14) -0.0117(14)  
 C5 0.0324(17) 0.0324(16) 0.0438(18) -0.0109(13) -0.0037(14) -0.0101(14)  
 C31 0.0327(18) 0.0309(16) 0.070(2) -0.0099(15) -0.0072(16) -0.0119(14)

C41 0.0351(17) 0.0288(15) 0.0390(17) -0.0057(13) -0.0021(13) -0.0147(13)  
C42 0.0349(18) 0.0330(16) 0.0404(18) -0.0068(14) -0.0028(14) -0.0128(14)  
C43 0.051(2) 0.0370(18) 0.049(2) -0.0127(15) 0.0029(16) -0.0219(16)  
C44 0.053(2) 0.0297(16) 0.051(2) 0.0025(15) -0.0003(16) -0.0131(15)  
C45 0.067(2) 0.047(2) 0.042(2) 0.0024(16) -0.0130(17) -0.0157(18)  
C46 0.054(2) 0.0385(17) 0.045(2) -0.0080(15) -0.0109(16) -0.0183(16)  
C61 0.0241(16) 0.0267(16) 0.053(2) -0.0001(14) -0.0023(14) -0.0098(13)  
C62 0.0398(19) 0.0339(18) 0.061(2) -0.0014(16) -0.0067(16) -0.0039(15)  
C64 0.061(3) 0.046(2) 0.072(3) -0.0208(19) 0.011(2) -0.0204(19)  
C65 0.066(3) 0.049(2) 0.058(2) -0.0047(19) -0.002(2) -0.026(2)  
C66 0.043(2) 0.0310(17) 0.064(2) 0.0071(16) -0.0125(17) -0.0121(15)

\_geom\_special\_details

;

All esds (except the esd in the dihedral angle between two l.s. planes) are estimated using the full covariance matrix. The cell esds are taken into account individually in the estimation of esds in distances, angles and torsion angles; correlations between esds in cell parameters are only used when they are defined by crystal symmetry. An approximate (isotropic) treatment of cell esds is used for estimating esds involving l.s. planes.

;

loop\_

\_geom\_bond\_atom\_site\_label\_1

\_geom\_bond\_atom\_site\_label\_2

\_geom\_bond\_distance

\_geom\_bond\_site\_symmetry\_2

\_geom\_bond\_publ\_flag

Cl42 C42 1.725(3) . ?

Cl44 C44 1.742(3) . ?

S5 C5 1.665(3) . ?

N1 C5 1.332(3) . ?

N1 N2 1.381(3) . ?

N1 H1 0.99(3) . ?

N2 C3 1.296(3) . ?

N4 C5 1.381(3) . ?

N4 C3 1.384(3) . ?

N4 C41 1.436(3) . ?

N63 C64 1.325(4) . ?

N63 C62 1.329(4) . ?

C3 C31 1.484(4) . ?

C31 C61 1.508(4) . ?

C31 H311 0.9700 . ?

C31 H312 0.9700 . ?

C41 C46 1.372(4) . ?

C41 C42 1.385(3) . ?

C42 C43 1.384(4) . ?

C43 C44 1.372(4) . ?

C43 H43 0.9300 . ?

C44 C45 1.380(4) . ?

C45 C46 1.383(4) . ?

C45 H45 0.9300 . ?  
C46 H46 0.9300 . ?  
C61 C66 1.370(4) . ?  
C61 C62 1.380(4) . ?  
C62 H62 0.9300 . ?  
C64 C65 1.374(5) . ?  
C64 H64 0.9300 . ?  
C65 C66 1.377(5) . ?  
C65 H65 0.9300 . ?  
C66 H66 0.9300 . ?

loop\_

\_geom\_angle\_atom\_site\_label\_1  
\_geom\_angle\_atom\_site\_label\_2  
\_geom\_angle\_atom\_site\_label\_3  
\_geom\_angle  
\_geom\_angle\_site\_symmetry\_1  
\_geom\_angle\_site\_symmetry\_3  
\_geom\_angle\_publ\_flag  
C5 N1 N2 113.6(2) . . ?  
C5 N1 H1 124.0(17) . . ?  
N2 N1 H1 122.4(17) . . ?  
C3 N2 N1 104.8(2) . . ?  
C5 N4 C3 108.5(2) . . ?  
C5 N4 C41 126.1(2) . . ?  
C3 N4 C41 125.4(2) . . ?  
C64 N63 C62 116.8(3) . . ?  
N2 C3 N4 110.1(2) . . ?  
N2 C3 C31 125.0(2) . . ?  
N4 C3 C31 124.8(2) . . ?  
N1 C5 N4 103.0(2) . . ?  
N1 C5 S5 129.1(2) . . ?  
N4 C5 S5 127.8(2) . . ?  
C3 C31 C61 114.8(2) . . ?  
C3 C31 H311 108.6 . . ?  
C61 C31 H311 108.6 . . ?  
C3 C31 H312 108.6 . . ?  
C61 C31 H312 108.6 . . ?  
H311 C31 H312 107.5 . . ?  
C46 C41 C42 119.8(2) . . ?  
C46 C41 N4 119.5(2) . . ?  
C42 C41 N4 120.7(2) . . ?  
C43 C42 C41 120.1(3) . . ?  
C43 C42 Cl42 119.3(2) . . ?  
C41 C42 Cl42 120.7(2) . . ?  
C44 C43 C42 119.1(3) . . ?  
C44 C43 H43 120.4 . . ?  
C42 C43 H43 120.4 . . ?  
C43 C44 C45 121.6(3) . . ?  
C43 C44 Cl44 119.5(2) . . ?  
C45 C44 Cl44 118.8(3) . . ?

C44 C45 C46 118.6(3) . . ?  
C44 C45 H45 120.7 . . ?  
C46 C45 H45 120.7 . . ?  
C41 C46 C45 120.8(3) . . ?  
C41 C46 H46 119.6 . . ?  
C45 C46 H46 119.6 . . ?  
C66 C61 C62 117.0(3) . . ?  
C66 C61 C31 122.9(3) . . ?  
C62 C61 C31 120.0(3) . . ?  
N63 C62 C61 124.3(3) . . ?  
N63 C62 H62 117.8 . . ?  
C61 C62 H62 117.8 . . ?  
N63 C64 C65 123.9(4) . . ?  
N63 C64 H64 118.0 . . ?  
C65 C64 H64 118.0 . . ?  
C64 C65 C66 117.6(4) . . ?  
C64 C65 H65 121.2 . . ?  
C66 C65 H65 121.2 . . ?  
C61 C66 C65 120.3(3) . . ?  
C61 C66 H66 119.8 . . ?  
C65 C66 H66 119.8 . . ?

loop\_

\_geom\_torsion\_atom\_site\_label\_1  
\_geom\_torsion\_atom\_site\_label\_2  
\_geom\_torsion\_atom\_site\_label\_3  
\_geom\_torsion\_atom\_site\_label\_4  
\_geom\_torsion  
\_geom\_torsion\_site\_symmetry\_1  
\_geom\_torsion\_site\_symmetry\_2  
\_geom\_torsion\_site\_symmetry\_3  
\_geom\_torsion\_site\_symmetry\_4  
\_geom\_torsion\_publ\_flag  
C5 N1 N2 C3 0.7(3) . . . . ?  
N1 N2 C3 N4 0.6(3) . . . . ?  
N1 N2 C3 C31 -175.9(3) . . . . ?  
C5 N4 C3 N2 -1.6(3) . . . . ?  
C41 N4 C3 N2 179.0(2) . . . . ?  
C5 N4 C3 C31 174.9(3) . . . . ?  
C41 N4 C3 C31 -4.5(4) . . . . ?  
N2 N1 C5 N4 -1.6(3) . . . . ?  
N2 N1 C5 S5 175.3(2) . . . . ?  
C3 N4 C5 N1 1.9(3) . . . . ?  
C41 N4 C5 N1 -178.7(2) . . . . ?  
C3 N4 C5 S5 -175.0(2) . . . . ?  
C41 N4 C5 S5 4.4(4) . . . . ?  
N2 C3 C31 C61 -118.1(3) . . . . ?  
N4 C3 C31 C61 65.9(4) . . . . ?  
C5 N4 C41 C46 -108.0(3) . . . . ?  
C3 N4 C41 C46 71.3(4) . . . . ?  
C5 N4 C41 C42 73.5(4) . . . . ?

C3 N4 C41 C42 -107.2(3) . . . ?  
C46 C41 C42 C43 0.8(4) . . . ?  
N4 C41 C42 C43 179.4(2) . . . ?  
C46 C41 C42 C43 -178.1(2) . . . ?  
N4 C41 C42 C43 0.5(4) . . . ?  
C41 C42 C43 C44 -0.7(4) . . . ?  
C42 C43 C44 C45 178.2(2) . . . ?  
C42 C43 C44 C45 -0.1(5) . . . ?  
C42 C43 C44 C45 178.0(2) . . . ?  
C43 C44 C45 C46 0.8(5) . . . ?  
C44 C44 C45 C46 -177.4(2) . . . ?  
C42 C41 C46 C45 -0.1(5) . . . ?  
N4 C41 C46 C45 -178.7(3) . . . ?  
C44 C45 C46 C41 -0.7(5) . . . ?  
C3 C31 C61 C66 44.0(4) . . . ?  
C3 C31 C61 C62 -138.6(3) . . . ?  
C64 N63 C62 C61 0.1(5) . . . ?  
C66 C61 C62 N63 0.5(5) . . . ?  
C31 C61 C62 N63 -177.0(3) . . . ?  
C62 N63 C64 C65 -0.7(5) . . . ?  
N63 C64 C65 C66 0.6(6) . . . ?  
C62 C61 C66 C65 -0.6(4) . . . ?  
C31 C61 C66 C65 176.8(3) . . . ?  
C64 C65 C66 C61 0.1(5) . . . ?

\_refine\_diff\_density\_max 0.263  
\_refine\_diff\_density\_min -0.250  
\_refine\_diff\_density\_rms 0.072

\_shelx\_res\_file  
;

shelx.res created by SHELXL-2014/7

TITL T17 in P-1  
CELL 0.71073 8.4234 8.8584 11.2513 81.356 83.534 66.032  
ZERR 2.00 0.0010 0.0009 0.0020 0.013 0.012 0.011  
LATT 1  
SFAC C H N S CL  
UNIT 28 20 8 2 4  
MERG 0  
FMAP 2  
ACTA  
BOND \$H  
CONF  
L.S. 40  
PLAN -2  
WGHT 0.058200  
EXTI 0.018621  
BASF 0.43793

FVAR 5.87660

CL42 5 0.008987 0.277750 0.114641 11.00000 0.06378 0.04856 =  
0.04694 -0.00870 -0.01592 -0.01844

CL44 5 0.260172 -0.211735 0.474562 11.00000 0.08883 0.03452 =  
0.07105 0.00877 -0.00268 -0.01920

S5 4 -0.292806 0.592551 0.309938 11.00000 0.03376 0.06467 =  
0.06436 -0.01031 -0.00279 -0.02114

N1 3 -0.081959 0.748820 0.214471 11.00000 0.03070 0.02521 =  
0.06097 -0.00794 -0.00583 -0.00290

H1 2 -0.177457 0.858046 0.192663 11.00000 -1.50000

N2 3 0.091303 0.724038 0.196216 11.00000 0.03547 0.02612 =  
0.06631 -0.00853 -0.00173 -0.01063

N4 3 0.060391 0.494564 0.275511 11.00000 0.02801 0.02387 =  
0.04315 -0.00519 -0.00611 -0.00974

N63 3 0.676106 0.072723 0.145731 11.00000 0.04444 0.03081 =  
0.08333 -0.00553 -0.00574 -0.00034

C3 1 0.175794 0.568754 0.234591 11.00000 0.03129 0.02702 =  
0.04883 -0.00972 -0.00419 -0.01168

C5 1 -0.107077 0.613449 0.264356 11.00000 0.03242 0.03237 =  
0.04381 -0.01091 -0.00373 -0.01014

C31 1 0.367567 0.485272 0.240914 11.00000 0.03272 0.03089 =  
0.06995 -0.00993 -0.00717 -0.01192

AFIX 23

H311 2 0.394293 0.442206 0.324017 11.00000 -1.50000

H312 2 0.416930 0.567624 0.216549 11.00000 -1.50000

AFIX 0

C41 1 0.108110 0.322973 0.322657 11.00000 0.03510 0.02879 =  
0.03901 -0.00571 -0.00211 -0.01468

C42 1 0.089052 0.212459 0.256222 11.00000 0.03493 0.03303 =  
0.04039 -0.00680 -0.00280 -0.01281

C43 1 0.137148 0.047155 0.302315 11.00000 0.05148 0.03697 =  
0.04935 -0.01269 0.00288 -0.02187

AFIX 43

H43 2 0.123435 -0.027359 0.258482 11.00000 -1.50000

AFIX 0

C44 1 0.205359 -0.005386 0.413579 11.00000 0.05303 0.02966 =  
0.05064 0.00252 -0.00028 -0.01312

C45 1 0.227310 0.102517 0.480386 11.00000 0.06702 0.04690 =  
0.04213 0.00245 -0.01296 -0.01573

AFIX 43

H45 2 0.274991 0.064972 0.555250 11.00000 -1.50000

AFIX 0

C46 1 0.176887 0.267666 0.433626 11.00000 0.05409 0.03855 =  
0.04473 -0.00801 -0.01087 -0.01826

AFIX 43

H46 2 0.189740 0.342179 0.477922 11.00000 -1.50000

AFIX 0

C61 1 0.454652 0.344724 0.164084 11.00000 0.02405 0.02670 =  
0.05332 -0.00005 -0.00230 -0.00980

C62 1 0.586891 0.200032 0.208447 11.00000 0.03981 0.03386 =

```

0.06124 -0.00142 -0.00672 -0.00387
AFIX 43
H62 2 0.615414 0.191068 0.287419 11.00000 -1.50000
AFIX 0
C64 1 0.633451 0.088206 0.033415 11.00000 0.06068 0.04568 =
0.07234 -0.02078 0.01103 -0.02037
AFIX 43
H64 2 0.695308 0.000801 -0.012128 11.00000 -1.50000
AFIX 0
C65 1 0.503254 0.225714 -0.019816 11.00000 0.06577 0.04936 =
0.05778 -0.00474 -0.00235 -0.02559
AFIX 43
H65 2 0.476729 0.231186 -0.098796 11.00000 -1.50000
AFIX 0
C66 1 0.413493 0.355082 0.047964 11.00000 0.04295 0.03096 =
0.06434 0.00706 -0.01250 -0.01212
AFIX 43
H66 2 0.324488 0.449954 0.014741 11.00000 -1.50000
AFIX 0
HKLF 5

REM T17 in P-1
REM R1 = 0.0397 for 3212 Fo > 4sig(Fo) and 0.0666 for all 4996 data
REM 195 parameters refined using 0 restraints

END

WGHT 0.0582 0.0000

REM Highest difference peak 0.263, deepest hole -0.250, 1-sigma level 0.072
Q1 1 -0.4070 0.5775 0.2774 11.00000 0.05 0.26
Q2 1 0.5058 0.1623 0.0052 11.00000 0.05 0.23
;
```



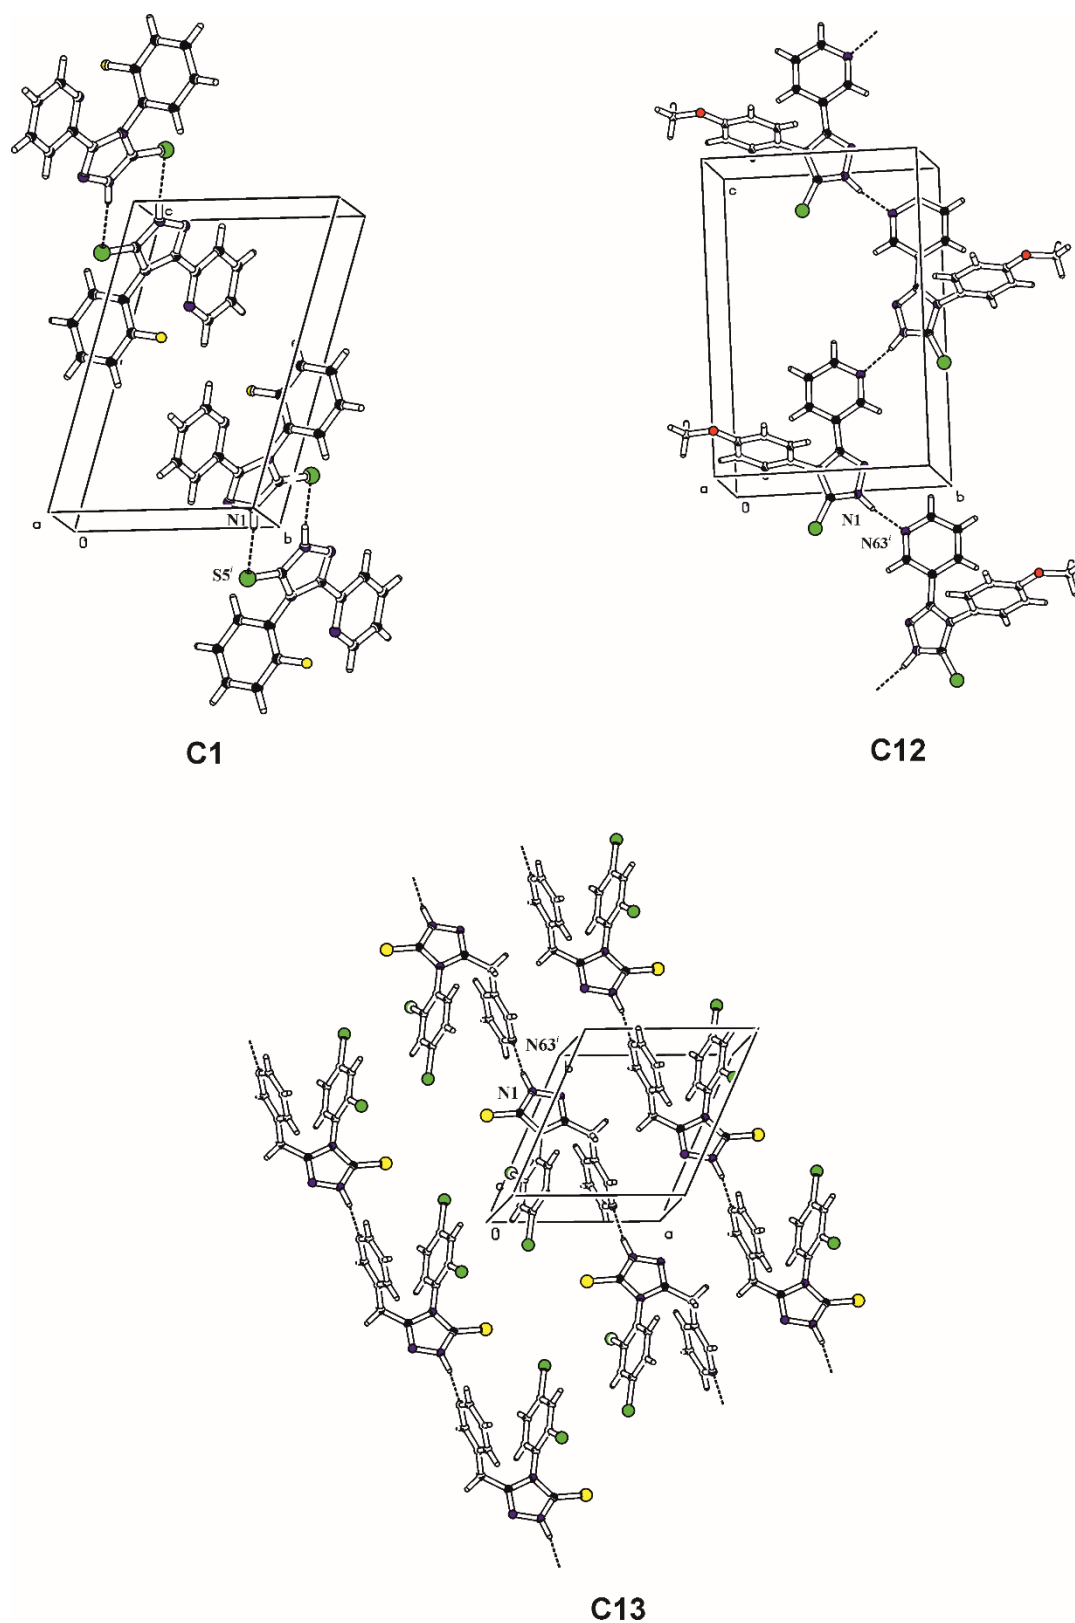

**Figure 1S.** The molecular packing of **C1**, **C12** and **C13**. Dashed lines indicate intermolecular hydrogen bonds; **C1**  $i = -x, 2-y, -z$ ; **C12**:  $i = x, 3/2-y, -1/2+z$ ; **C13**:  $i = -1+x, 1+y, z$ .

## MS analysis for new compounds

Table 1S.

| LP. | Compound formula, theoretical and measured monoisotopic mass, and mass difference in ppm                                                                                                           | Theoretical monoisotopic mass of protonated ion and acquired LC/QTOF HRMS spectra                                                                                                               |
|-----|----------------------------------------------------------------------------------------------------------------------------------------------------------------------------------------------------|-------------------------------------------------------------------------------------------------------------------------------------------------------------------------------------------------|
| B13 | <p>C<sub>14</sub>H<sub>12</sub>N<sub>4</sub>O<sub>2</sub>SCl<sub>2</sub></p> <p>Calculated monoisotopic mass: 354.0109</p> <p>Measured monoisotopic mass: 354.0122</p> <p>Mass error: 3.84 ppm</p> | <p>Theoretical monoisotopic mass of [M+H]<sup>+</sup>: 355.0182</p> 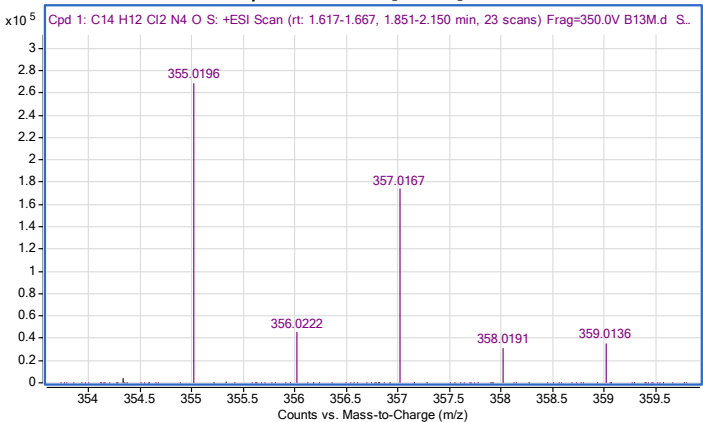 <p>Counts vs. Mass-to-Charge (m/z)</p>   |
| B14 | <p>C<sub>14</sub>H<sub>12</sub>N<sub>4</sub>O<sub>2</sub>SCl<sub>2</sub></p> <p>Calculated monoisotopic mass: 354.0109</p> <p>Measured monoisotopic mass: 354.012</p> <p>Mass error: 3.13 ppm</p>  |  <p>Counts vs. Mass-to-Charge (m/z)</p>                                                                     |
| C13 | <p>C<sub>14</sub>H<sub>10</sub>N<sub>4</sub>SCl<sub>2</sub></p> <p>Calculated monoisotopic mass: 336.0003</p> <p>Measured monoisotopic mass: 336.0017</p> <p>Mass error: 3.96 ppm</p>              |  <p>Counts vs. Mass-to-Charge (m/z)</p>                                                                     |
| C14 | <p>C<sub>14</sub>H<sub>10</sub>N<sub>4</sub>SCl<sub>2</sub></p> <p>Calculated monoisotopic mass: 336.0003</p> <p>Measured monoisotopic mass: 336.0006</p> <p>Mass error: 0.78 ppm</p>              | <p>Theoretical monoisotopic mass of [M+H]<sup>+</sup>: 337.0076</p>  <p>Counts vs. Mass-to-Charge (m/z)</p> |

## Theoretical calculation

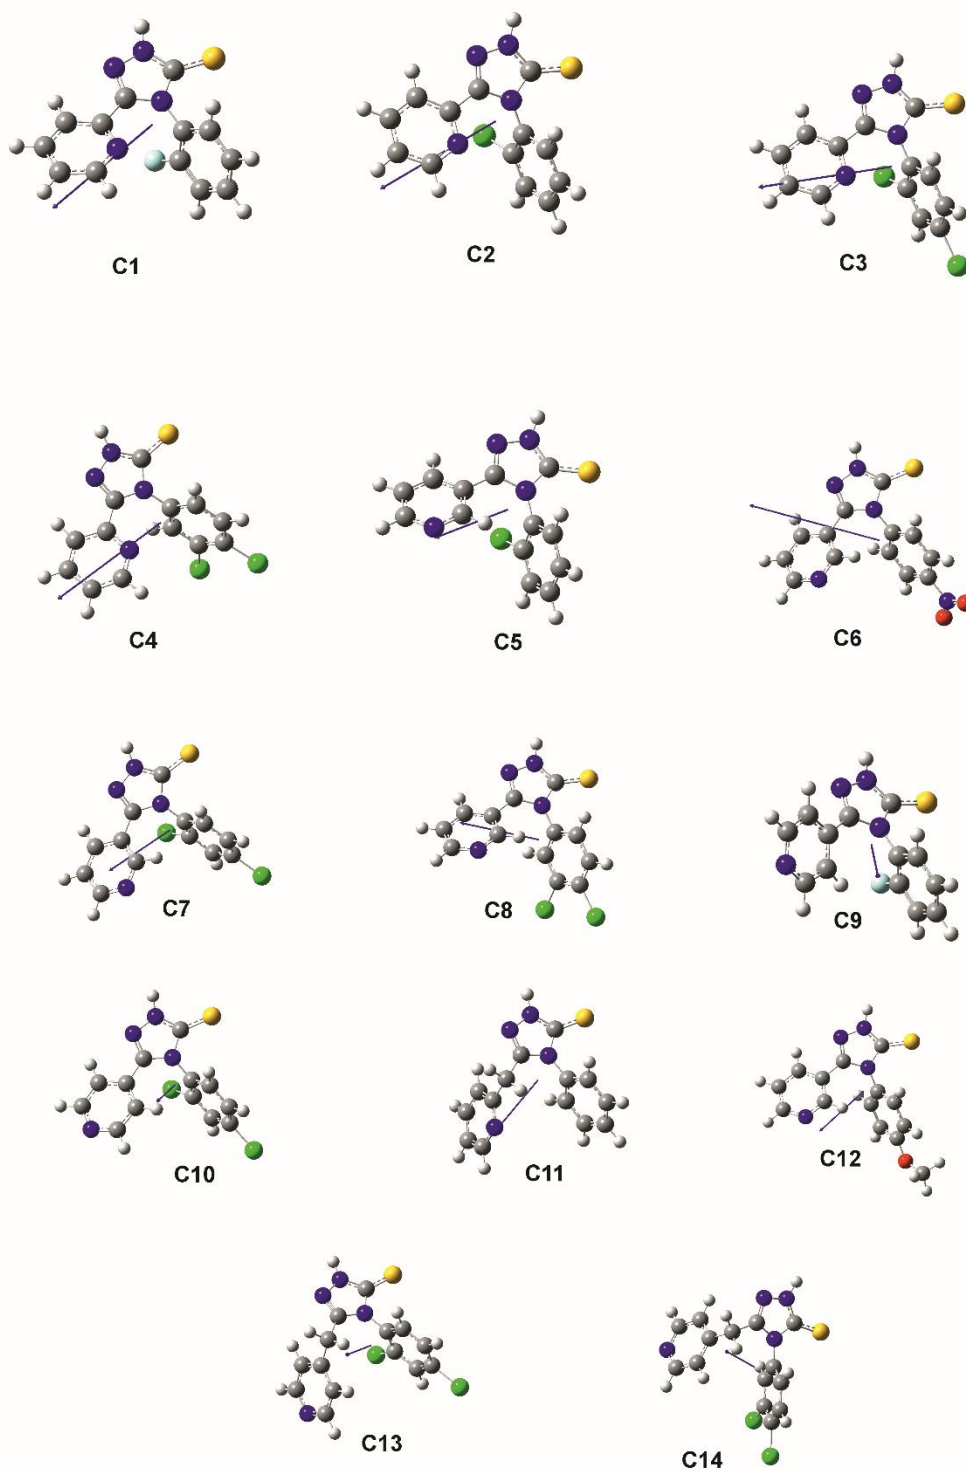

**Figure 2S.** A view of the molecules **C1–C14** with the vectors of dipole moments in the low-energy conformation calculated at the DFT/B3LYP/6-311++G(d,p) level.

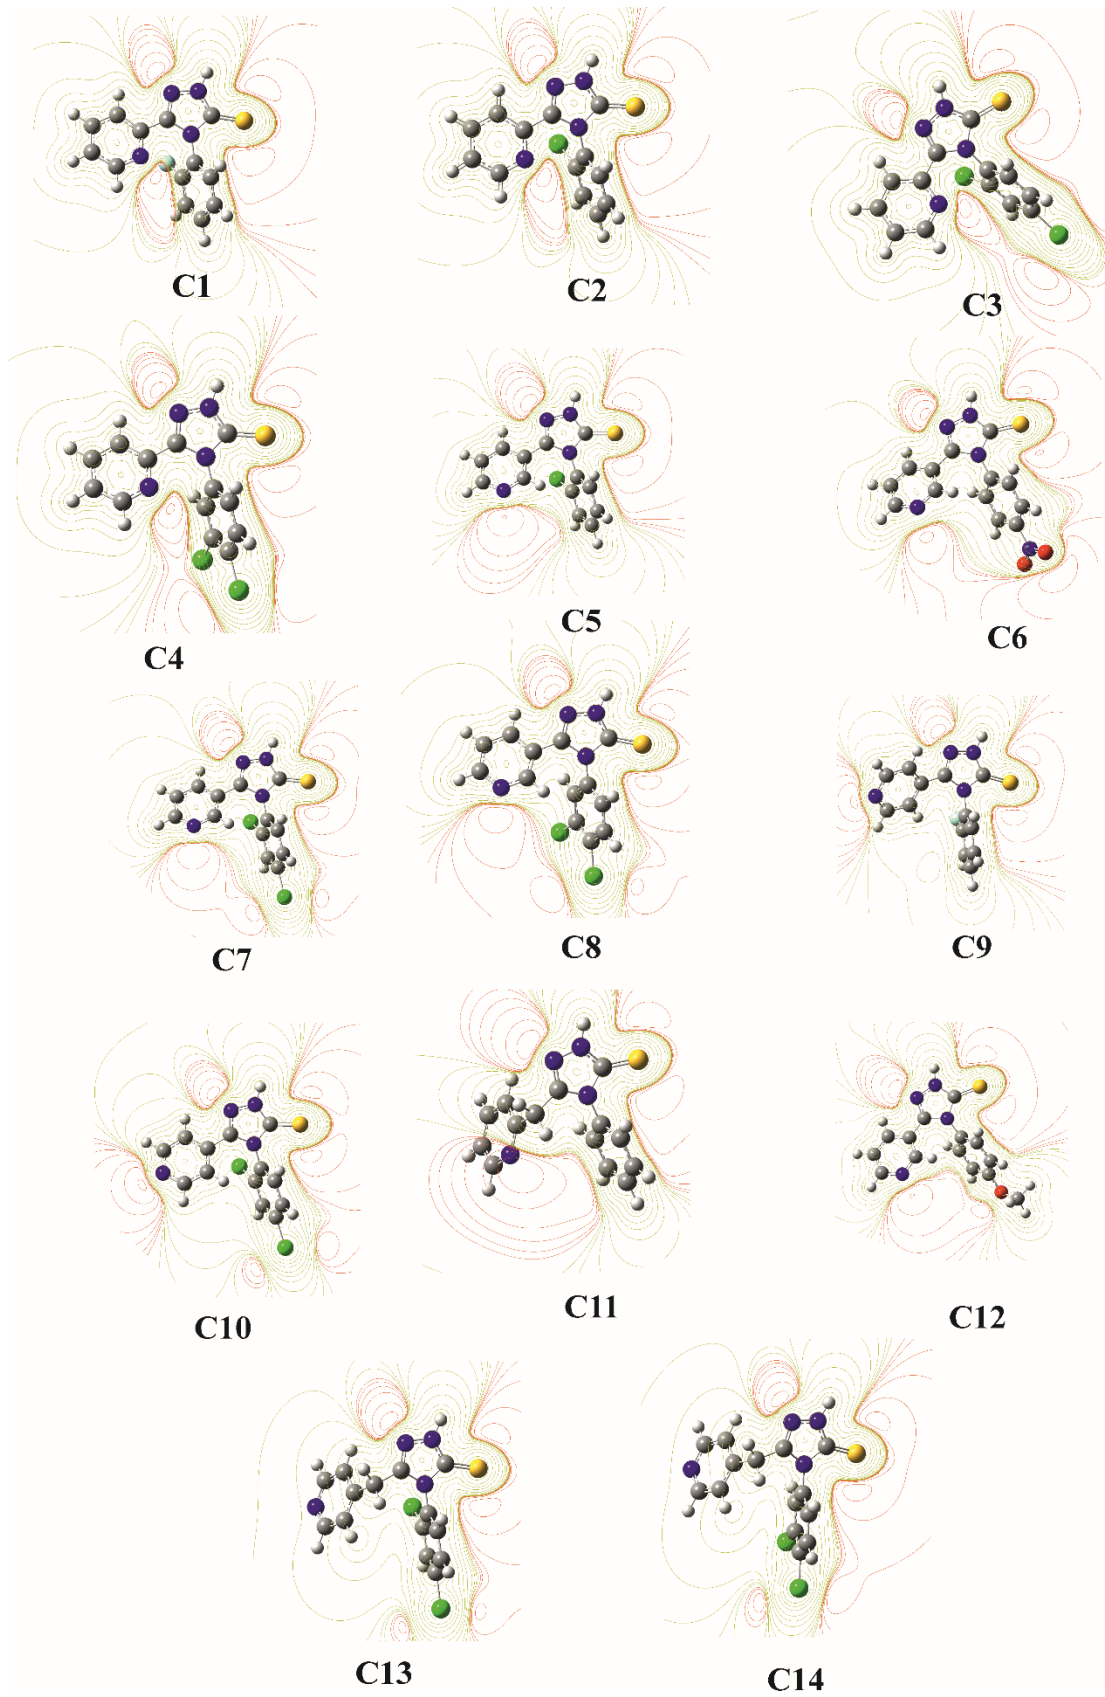

**Fig. 3S.** The contour maps of molecular electrostatic potential for compounds **C1–C14** in the plane of 1,2,4-triazole ring; the red lines represent regions with the negative electrostatic potential and yellow lines represent regions with the positive electrostatic potential.

***Molecular docking***

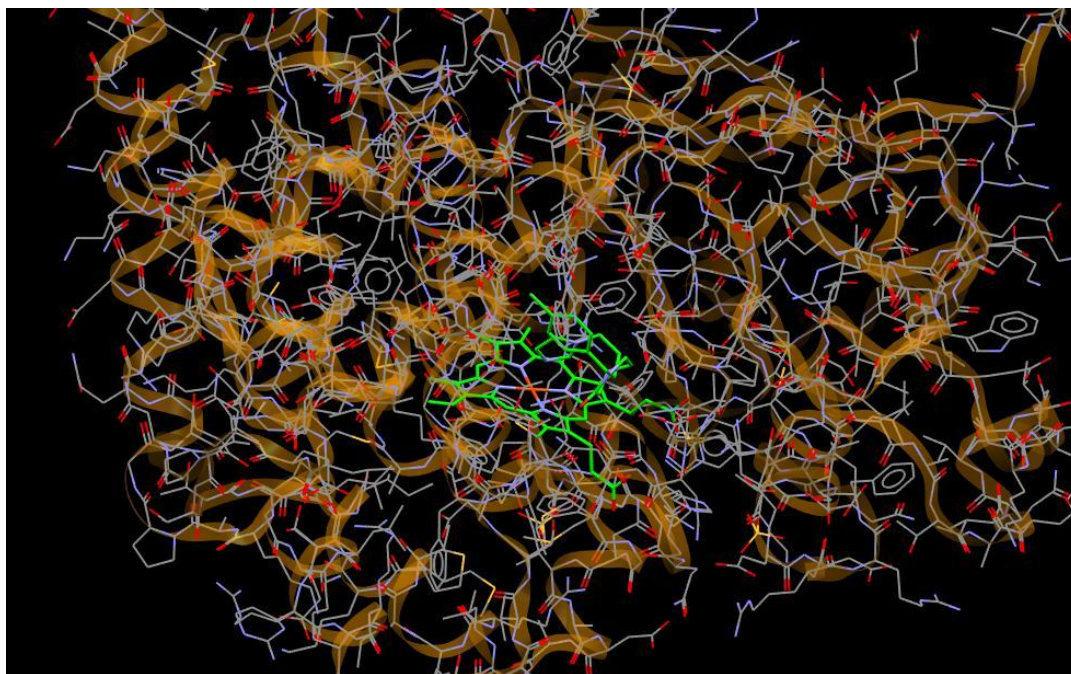

**Fig. 4S.** The crystal structure of the cytochrome P450 CYP121 of *Mycobacterium tuberculosis* obtained from expression system *Escherichia coli* in complex with 1-[(4-chlorophenyl)methyl]-4-(3-imidazol-1-ylpropyl)piperazin-2-one (9KE) and heme.

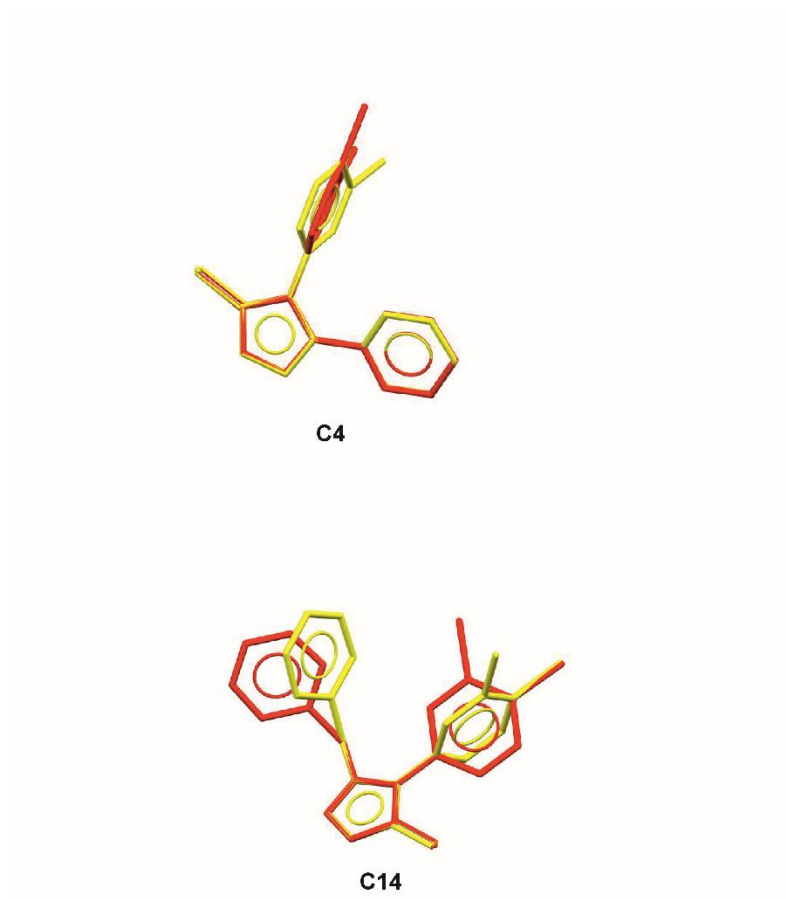

**Fig. 5S.** The overlay of molecules **C4** and **C14** in conformations observed in binding site of the cytochrome P450 CYP121 (red) and to their starting conformations for the docking process obtained as a result of energy minimization and energy optimization at DFT level (yellow).

**Spectral data for new compounds:**

**Compound B13**

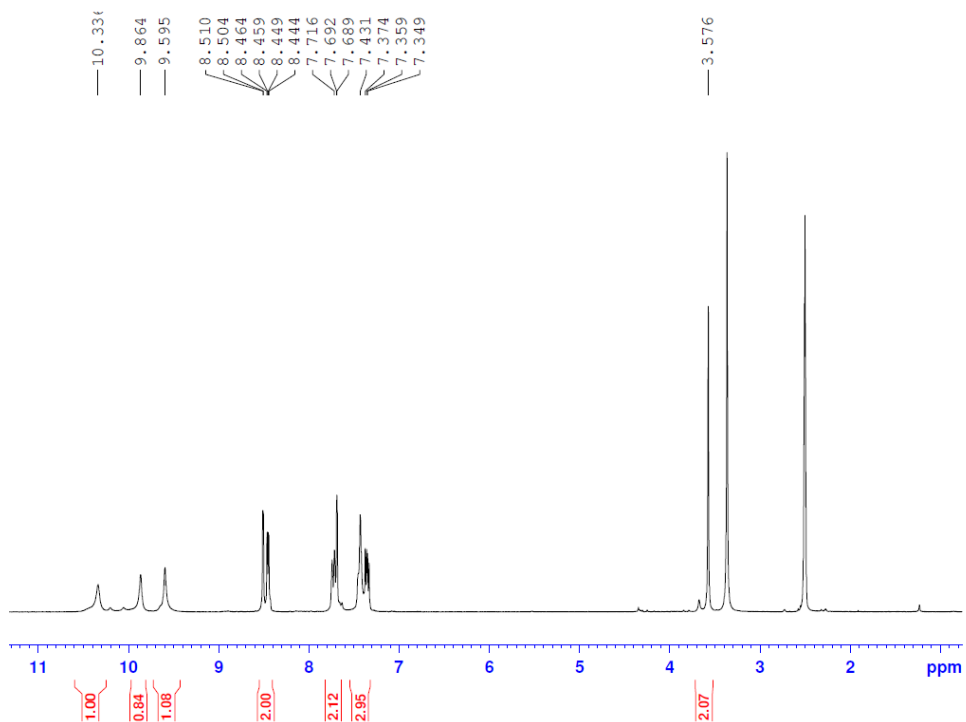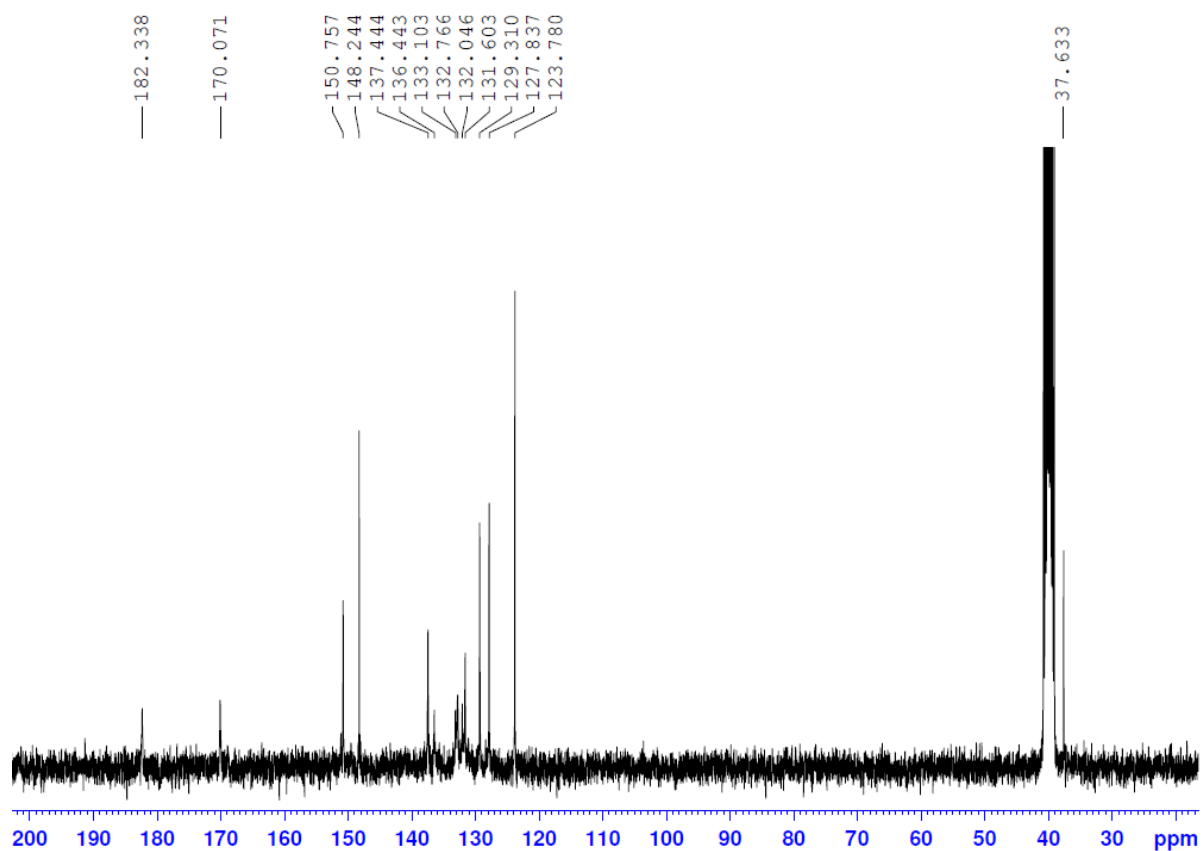

# Compound B14

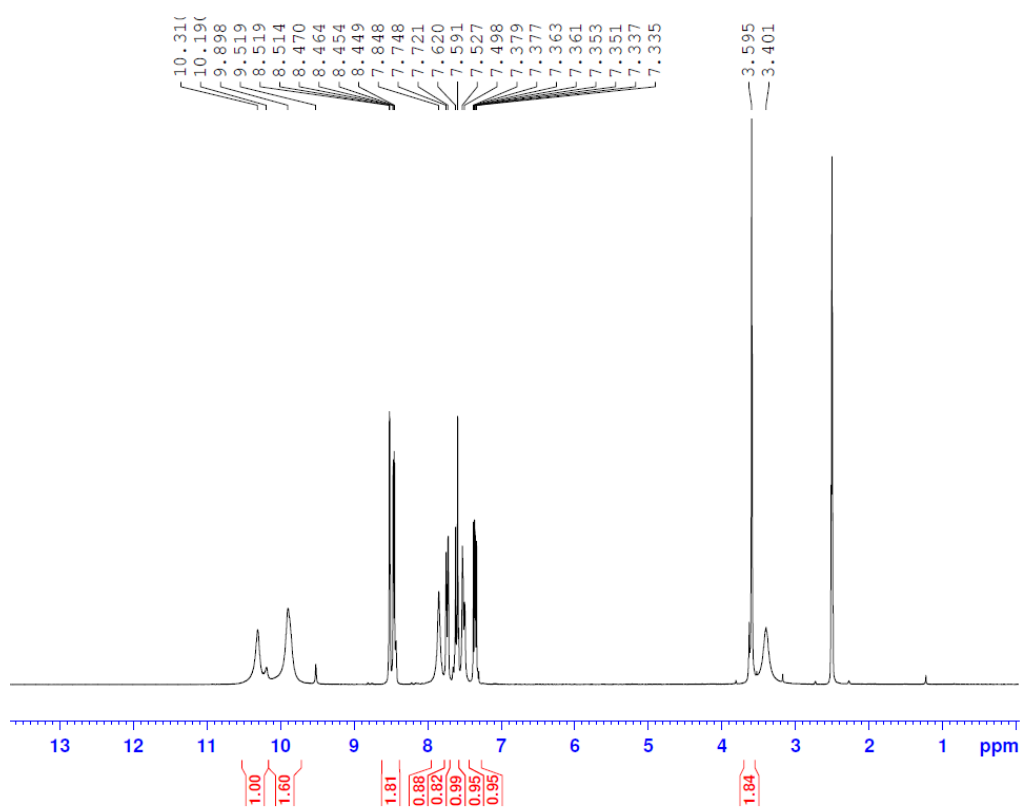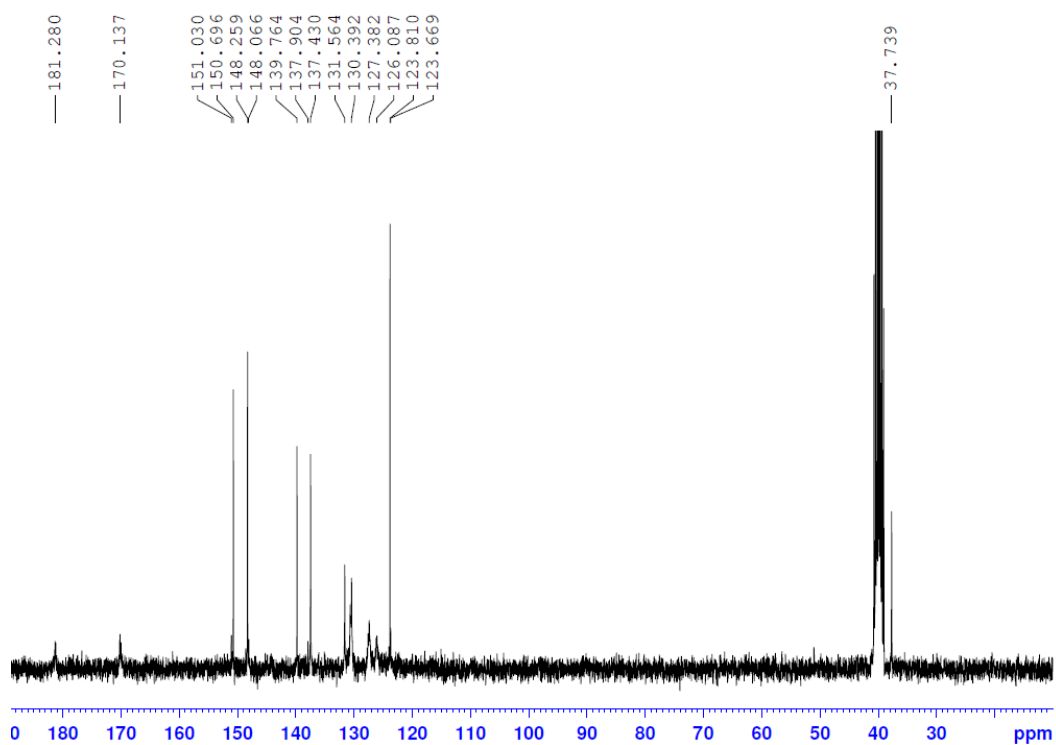



### Compound C13

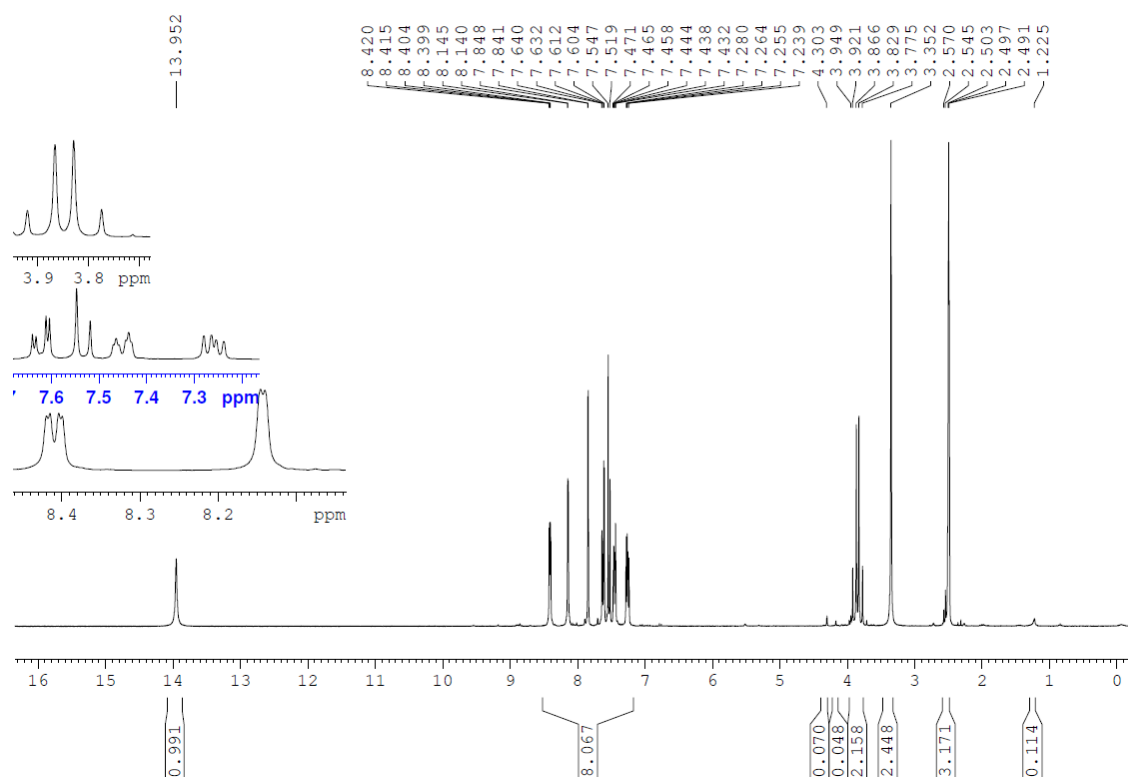

### Compound C14

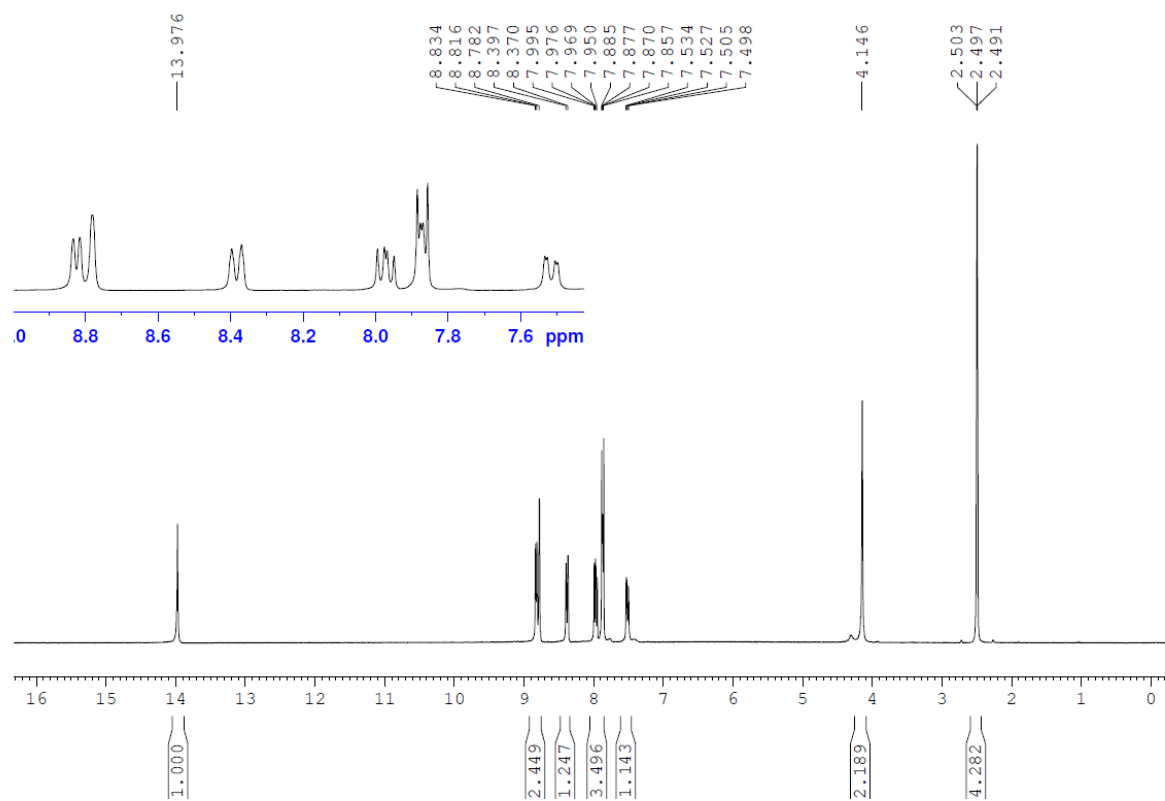

Supplement: molecules-25-06033-s001.pdf [file molecules-25-06033-s001.pdf]
